# Supplementary material for: Peculiar transcriptional reprogramming with functional impairment of dendritic cells upon exposure to transformed HTLV-1-infected cells
Source: bioRxiv preprint, doi:10.1101/2024.05.21.592359, version 3 (2024-07-09)
Supplement: Supplemental Table 5 [file 592359_file13.xlsx]

## Sheet: Lipid biosynthesis and metaboli
Steroid Biosynthesis	Terpenoid backbone biosynthesis	Lipid and atherosclerosis	Total
DHCR24	FDPS	CASP7	CASP7
DHCR7	HMGCS1	CCL2	CCL2
NSDHL	MVD	HSPA8	DHCR24
TM7SF2	ACAT1	IL12B	DHCR7
CEL	ACAT2	LYN	FDPS
CYP24A1	CHURC1-FNTB	MYD88	HMGCS1
CYP27B1	DHDDS	TICAM2	HSPA8
CYP2R1	FNTA	TNF	IL12B
CYP51A1	FNTB	VCAM1	LYN
EBP	GGPS1	ABCA1	MVD
FDFT1	HMGCR	ABCG1	MYD88
HSD17B7	HMGCS2	AGER	NSDHL
LBR	ICMT	AKT1	TICAM2
LIPA	IDI1	AKT2	TM7SF2
LSS	IDI2	AKT3	TNF
MSMO1	MVK	APAF1	VCAM1
SC5D	NUS1	APOA1	ABCA1
SOAT1	PCYOX1	APOA4	ABCG1
SOAT2	PDSS1	APOB	ACAT1
SQLE	PDSS2	ARHGEF1	ACAT2
	PMVK	ATF4	AGER
	RCE1	ATF6	AKT1
	ZMPSTE24	BAD	AKT2
		BAX	AKT3
		BCL2	APAF1
		BCL2L1	APOA1
		BID	APOA4
		CALM1	APOB
		CALM2	ARHGEF1
		CALM3	ATF4
		CALML3	ATF6
		CALML4	BAD
		CALML5	BAX
		CALML6	BCL2
		CAMK2A	BCL2L1
		CAMK2B	BID
		CAMK2D	CALM1
		CAMK2G	CALM2
		CASP1	CALM3
		CASP3	CALML3
		CASP6	CALML4
		CASP8	CALML5
		CASP9	CALML6
		CCL3	CAMK2A
		CCL3L1	CAMK2B
		CCL3L3	CAMK2D
		CCL5	CAMK2G
		CD14	CASP1
		CD36	CASP3
		CD40	CASP6
		CD40LG	CASP8
		CDC42	CASP9
		CHUK	CCL3
		CXCL1	CCL3L1
		CXCL2	CCL3L3
		CXCL3	CCL5
		CXCL8	CD14
		CYBA	CD36
		CYBB	CD40
		CYCS	CD40LG
		CYP1A1	CDC42
		CYP2A6	CEL
		CYP2A7	CHUK
		CYP2B6	CHURC1-FNTB
		CYP2C8	CXCL1
		CYP2C9	CXCL2
		CYP2J2	CXCL3
		DDIT3	CXCL8
		EIF2AK3	CYBA
		EIF2S1	CYBB
		ERN1	CYCS
		ERO1A	CYP1A1
		FAS	CYP24A1
		FASLG	CYP27B1
		FOS	CYP2A6
		GSK3B	CYP2A7
		HRAS	CYP2B6
		HSP90AA1	CYP2C8
		HSP90AB1	CYP2C9
		HSP90B1	CYP2J2
		HSPA1A	CYP2R1
		HSPA1B	CYP51A1
		HSPA1L	DDIT3
		HSPA2	DHDDS
		HSPA4	EBP
		HSPA5	EIF2AK3
		HSPA6	EIF2S1
		HSPD1	ERN1
		ICAM1	ERO1A
		IFNA1	FAS
		IFNA10	FASLG
		IFNA13	FDFT1
		IFNA14	FNTA
		IFNA16	FNTB
		IFNA17	FOS
		IFNA2	GGPS1
		IFNA21	GSK3B
		IFNA4	HMGCR
		IFNA5	HMGCS2
		IFNA6	HRAS
		IFNA7	HSD17B7
		IFNA8	HSP90AA1
		IFNB1	HSP90AB1
		IKBKB	HSP90B1
		IKBKE	HSPA1A
		IKBKG	HSPA1B
		IL12A	HSPA1L
		IL18	HSPA2
		IL1B	HSPA4
		IL6	HSPA5
		IRAK1	HSPA6
		IRAK4	HSPD1
		IRF3	ICAM1
		IRF7	ICMT
		ITPR1	IDI1
		JAK2	IDI2
		JUN	IFNA1
		KRAS	IFNA10
		LBP	IFNA13
		LDLR	IFNA14
		LY96	IFNA16
		MAP2K3	IFNA17
		MAP2K4	IFNA2
		MAP2K6	IFNA21
		MAP2K7	IFNA4
		MAP3K5	IFNA5
		MAP3K7	IFNA6
		MAPK1	IFNA7
		MAPK10	IFNA8
		MAPK11	IFNB1
		MAPK12	IKBKB
		MAPK13	IKBKE
		MAPK14	IKBKG
		MAPK3	IL12A
		MAPK8	IL18
		MAPK9	IL1B
		MIB1	IL6
		MIB2	IRAK1
		MMP1	IRAK4
		MMP3	IRF3
		MMP9	IRF7
		NCF1	ITPR1
		NCF2	JAK2
		NCF4	JUN
		NFATC1	KRAS
		NFATC2	LBP
		NFATC3	LBR
		NFE2L2	LDLR
		NFKB1	LIPA
		NFKBIA	LSS
		NLRP3	LY96
		NOS3	MAP2K3
		NOX1	MAP2K4
		NRAS	MAP2K6
		OLR1	MAP2K7
		PDPK1	MAP3K5
		PIK3CA	MAP3K7
		PIK3CB	MAPK1
		PIK3CD	MAPK10
		PIK3R1	MAPK11
		PIK3R2	MAPK12
		PIK3R3	MAPK13
		PLCB1	MAPK14
		PLCB2	MAPK3
		PLCB3	MAPK8
		PLCB4	MAPK9
		PLCG1	MIB1
		POU2F1	MIB2
		POU2F2	MMP1
		POU2F3	MMP3
		PPARG	MMP9
		PPP3CA	MSMO1
		PPP3CB	MVK
		PPP3CC	NCF1
		PPP3R1	NCF2
		PPP3R2	NCF4
		PRKCA	NFATC1
		PTK2	NFATC2
		PYCARD	NFATC3
		RAC1	NFE2L2
		RAP1A	NFKB1
		RAP1B	NFKBIA
		RELA	NLRP3
		RHOA	NOS3
		ROCK2	NOX1
		RXRA	NRAS
		RXRB	NUS1
		RXRG	OLR1
		SELE	PCYOX1
		SELP	PDPK1
		SOD2	PDSS1
		SRC	PDSS2
		STAT3	PIK3CA
		TAB1	PIK3CB
		TAB2	PIK3CD
		TANK	PIK3R1
		TBK1	PIK3R2
		TICAM1	PIK3R3
		TIRAP	PLCB1
		TLR2	PLCB2
		TLR4	PLCB3
		TLR6	PLCB4
		TNFRSF10A	PLCG1
		TNFRSF10B	PMVK
		TNFRSF1A	POU2F1
		TNFSF10	POU2F2
		TP53	POU2F3
		TRAF2	PPARG
		TRAF3	PPP3CA
		TRAF6	PPP3CB
		VAV1	PPP3CC
		VAV2	PPP3R1
		VAV3	PPP3R2
		VLDLR	PRKCA
		XBP1	PTK2
			PYCARD
			RAC1
			RAP1A
			RAP1B
			RCE1
			RELA
			RHOA
			ROCK2
			RXRA
			RXRB
			RXRG
			SC5D
			SELE
			SELP
			SOAT1
			SOAT2
			SOD2
			SQLE
			SRC
			STAT3
			TAB1
			TAB2
			TANK
			TBK1
			TICAM1
			TIRAP
			TLR2
			TLR4
			TLR6
			TNFRSF10A
			TNFRSF10B
			TNFRSF1A
			TNFSF10
			TP53
			TRAF2
			TRAF3
			TRAF6
			VAV1
			VAV2
			VAV3
			VLDLR
			XBP1
			ZMPSTE24

## Sheet: Parasitic infection
African trypanosomiasis	Malaria	Toxoplasmosis	Total
IDO1	CCL2	HSPA8	CCL2
IL12B	HGF	IL12B	HGF
MYD88	MYD88	ITGA6	HSPA8
TNF	TNF	MYD88	IDO1
VCAM1	VCAM1	TNF	IL12B
APOA1	ACKR1	AKT1	ITGA6
APOL1	CD36	AKT2	MYD88
F2RL1	CD40	AKT3	TNF
FAS	CD40LG	ALOX5	VCAM1
FASLG	CD81	BAD	ACKR1
GNAQ	COMP	BCL2	AKT1
HBA1	CR1	BCL2L1	AKT2
HBA2	CR1L	BIRC2	AKT3
HBB	CSF3	BIRC3	ALOX5
HPR	CXCL8	BIRC7	APOA1
ICAM1	GYPA	CASP3	APOL1
IDO2	GYPB	CASP8	BAD
IFNG	GYPC	CASP9	BCL2
IL10	HBA1	CCR5	BCL2L1
IL12A	HBA2	CD40	BIRC2
IL18	HBB	CD40LG	BIRC3
IL1B	ICAM1	CHUK	BIRC7
IL6	IFNG	CIITA	CASP3
KNG1	IL10	CYCS	CASP8
LAMA4	IL12A	GNAI1	CASP9
LOC102723407	IL18	GNAI2	CCR5
NPPA	IL1B	GNAI3	CD36
PLCB1	IL6	GNAO1	CD40
PLCB2	ITGAL	HLA-DMA	CD40LG
PLCB3	ITGB2	HLA-DMB	CD81
PLCB4	KLRB1	HLA-DOA	CHUK
PRKCA	KLRC4-KLRK1	HLA-DOB	CIITA
PRKCB	KLRK1	HLA-DPA1	COMP
PRKCG	LRP1	HLA-DPB1	CR1
SELE	MET	HLA-DQA1	CR1L
THOP1	PECAM1	HLA-DQA2	CSF3
TLR9	SDC1	HLA-DQB1	CXCL8
	SDC2	HLA-DRA	CYCS
	SELE	HLA-DRB1	F2RL1
	SELP	HLA-DRB3	FAS
	TGFB1	HLA-DRB4	FASLG
	TGFB2	HLA-DRB5	GNAI1
	TGFB3	HSPA1A	GNAI2
	THBS1	HSPA1B	GNAI3
	THBS2	HSPA1L	GNAO1
	THBS3	HSPA2	GNAQ
	THBS4	HSPA6	GYPA
	TLR2	IFNG	GYPB
	TLR4	IFNGR1	GYPC
	TLR9	IFNGR2	HBA1
		IKBKB	HBA2
		IKBKG	HBB
		IL10	HLA-DMA
		IL10RA	HLA-DMB
		IL10RB	HLA-DOA
		IL12A	HLA-DOB
		IRAK1	HLA-DPA1
		IRAK4	HLA-DPB1
		IRGM	HLA-DQA1
		ITGB1	HLA-DQA2
		JAK1	HLA-DQB1
		JAK2	HLA-DRA
		LAMA1	HLA-DRB1
		LAMA2	HLA-DRB3
		LAMA3	HLA-DRB4
		LAMA4	HLA-DRB5
		LAMA5	HPR
		LAMB1	HSPA1A
		LAMB2	HSPA1B
		LAMB3	HSPA1L
		LAMB4	HSPA2
		LAMC1	HSPA6
		LAMC2	ICAM1
		LAMC3	IDO2
		LDLR	IFNG
		LY96	IFNGR1
		MAP2K3	IFNGR2
		MAP2K6	IKBKB
		MAP3K7	IKBKG
		MAPK1	IL10
		MAPK10	IL10RA
		MAPK11	IL10RB
		MAPK12	IL12A
		MAPK13	IL18
		MAPK14	IL1B
		MAPK3	IL6
		MAPK8	IRAK1
		MAPK9	IRAK4
		NFKB1	IRGM
		NFKBIA	ITGAL
		NFKBIB	ITGB1
		NOS2	ITGB2
		PDPK1	JAK1
		PIK3CG	JAK2
		PIK3R5	KLRB1
		PIK3R6	KLRC4-KLRK1
		PPIF	KLRK1
		RELA	KNG1
		SOCS1	LAMA1
		STAT1	LAMA2
		STAT3	LAMA3
		TAB1	LAMA4
		TAB2	LAMA5
		TGFB1	LAMB1
		TGFB2	LAMB2
		TGFB3	LAMB3
		TLR2	LAMB4
		TLR4	LAMC1
		TNFRSF1A	LAMC2
		TRAF6	LAMC3
		TYK2	LDLR
		XIAP	LOC102723407
			LRP1
			LY96
			MAP2K3
			MAP2K6
			MAP3K7
			MAPK1
			MAPK10
			MAPK11
			MAPK12
			MAPK13
			MAPK14
			MAPK3
			MAPK8
			MAPK9
			MET
			NFKB1
			NFKBIA
			NFKBIB
			NOS2
			NPPA
			PDPK1
			PECAM1
			PIK3CG
			PIK3R5
			PIK3R6
			PLCB1
			PLCB2
			PLCB3
			PLCB4
			PPIF
			PRKCA
			PRKCB
			PRKCG
			RELA
			SDC1
			SDC2
			SELE
			SELP
			SOCS1
			STAT1
			STAT3
			TAB1
			TAB2
			TGFB1
			TGFB2
			TGFB3
			THBS1
			THBS2
			THBS3
			THBS4
			THOP1
			TLR2
			TLR4
			TLR9
			TNFRSF1A
			TRAF6
			TYK2
			XIAP

## Sheet: TNF signaling pathway
TNF signaling pathway
CASP7
CCL2
CCL20
CXCL10
EDN1
LTA
RIPK3
TNF
VCAM1
AKT1
AKT2
AKT3
ATF2
ATF4
ATF6B
BAG4
BCL3
BIRC2
BIRC3
CASP10
CASP3
CASP8
CCL5
CEBPB
CFLAR
CHUK
CREB1
CREB3
CREB3L1
CREB3L2
CREB3L3
CREB3L4
CREB5
CSF1
CSF2
CX3CL1
CXCL1
CXCL2
CXCL3
CXCL5
CXCL6
DAB2IP
DNM1L
FADD
FAS
FOS
ICAM1
IFNB1
IKBKB
IKBKG
IL15
IL18R1
IL1B
IL6
IRF1
ITCH
JAG1
JUN
JUNB
LIF
MAP2K1
MAP2K3
MAP2K4
MAP2K6
MAP2K7
MAP3K14
MAP3K5
MAP3K7
MAP3K8
MAPK1
MAPK10
MAPK11
MAPK12
MAPK13
MAPK14
MAPK3
MAPK8
MAPK9
MLKL
MMP14
MMP3
MMP9
NFKB1
NFKBIA
NOD2
PGAM5
PIK3CA
PIK3CB
PIK3CD
PIK3R1
PIK3R2
PIK3R3
PTGS2
RELA
RIPK1
RPS6KA4
RPS6KA5
SELE
SOCS3
TAB1
TAB2
TAB3
TNFAIP3
TNFRSF1A
TNFRSF1B
TRADD
TRAF1
TRAF2
TRAF3
TRAF5
VEGFC
VEGFD

## Sheet: Bacterial infection
Legionellosis	Pertussis	Pathogenic Escherichia coli infection	Total
MYD88	MYD88	ACTG1	ACTG1
CASP7	TICAM2	CASP7	CASP7
HSPA8	CASP7	MYD88	HSPA8
IL12B	IRF8	MYO1A	IL12B
TNF	IL12B	MYO5C	IRF8
ARF1	TNF	TNF	MYD88
BNIP3	CXCL5	TUBB2A	MYO1A
BCL2L13	CXCL6	WASF3	MYO5C
CXCL1	CXCL8	ABCF2	TICAM2
CXCL2	CD14	ABI1	TNF
CXCL3	FOS	ABL1	TUBB2A
CXCL8	GNAI1	ACTB	WASF3
CD14	GNAI2	ACTR2	ABCF2
CLK1	GNAI3	ACTR3	ABI1
CLK4	JUN	ACTR3B	ABL1
HBS1L	NLRP3	ACTR3C	ACTB
NFKBIA	PYCARD	ARF1	ACTR2
NLRC4	RELA	ARF6	ACTR3
NAIP	TICAM1	ARHGEF1	ACTR3B
PYCARD	TIRAP	ARHGEF11	ACTR3C
RAB1A	TRAF6	ARHGEF12	APAF1
RAB1B	CALM1	ARHGEF2	ARF1
RELA	CALM2	ARPC1A	ARF6
SEC22B	CALM3	ARPC1B	ARHGEF1
APAF1	CALML3	ARPC2	ARHGEF11
CASP1	CALML4	ARPC3	ARHGEF12
CASP3	CALML5	ARPC4	ARHGEF2
CASP8	CALML6	ARPC5	ARPC1A
CASP9	CASP1	ARPC5L	ARPC1B
C3	CASP3	BAIAP2	ARPC2
CR1	CFL1	BAIAP2L1	ARPC3
CR1L	CFL2	BAK1	ARPC4
CYCS	C1QA	BAX	ARPC5
EEF1A1	C1QB	BRK1	ARPC5L
EEF1A2	C1QC	CASP1	BAIAP2
EEF1G	C1R	CASP3	BAIAP2L1
HSPA1L	C1S	CASP4	BAK1
HSPA1A	C2	CASP8	BAX
HSPA1B	C3	CASP9	BCL2L13
HSPA2	C4A	CDC42	BNIP3
HSPA6	C4B	CHUK	BRK1
HSPD1	C5	CLDN1	C1QA
HSF1	C4BPA	CLDN10	C1QB
ITGAM	C4BPB	CLDN11	C1QC
ITGB2	ITGA5	CLDN14	C1R
IL1B	ITGAM	CLDN15	C1S
IL12A	ITGB1	CLDN16	C2
IL18	ITGB2	CLDN17	C3
IL6	IRF1	CLDN18	C4A
NFKB1	IRF3	CLDN19	C4B
NFKB2	IL1A	CLDN2	C4BPA
SAR1A	IL1B	CLDN20	C4BPB
SAR1B	IRAK1	CLDN22	C5
TLR2	IRAK4	CLDN23	CALM1
TLR4	IL10	CLDN24	CALM2
TLR5	IL12A	CLDN25	CALM3
VCP	IL23A	CLDN3	CALML3
	IL6	CLDN34	CALML4
	LY96	CLDN4	CALML5
	MAPK1	CLDN5	CALML6
	MAPK10	CLDN6	CASP1
	MAPK11	CLDN7	CASP3
	MAPK12	CLDN8	CASP4
	MAPK13	CLDN9	CASP8
	MAPK14	CTTN	CASP9
	MAPK3	CXCL8	CD14
	MAPK8	CYCS	CDC42
	MAPK9	CYFIP1	CFL1
	NOS2	CYFIP2	CFL2
	NFKB1	CYTH1	CHUK
	NOD1	CYTH2	CLDN1
	RHOA	CYTH3	CLDN10
	SERPING1	CYTH4	CLDN11
	SFTPA1	EZR	CLDN14
	SFTPA2	F2	CLDN15
	TLR4	F2R	CLDN16
		FADD	CLDN17
		FAS	CLDN18
		FASLG	CLDN19
		FCGR2A	CLDN2
		FOS	CLDN20
		FYN	CLDN22
		GAPDH	CLDN23
		GNA12	CLDN24
		GNA13	CLDN25
		HCLS1	CLDN3
		IKBKB	CLDN34
		IKBKG	CLDN4
		IL18	CLDN5
		IL1B	CLDN6
		IL1R1	CLDN7
		IL6	CLDN8
		IRAK1	CLDN9
		IRAK4	CLK1
		ITGB1	CLK4
		JUN	CR1
		LOC102723407	CR1L
		LPAR1	CTTN
		LPAR2	CXCL1
		LPAR4	CXCL2
		LPAR5	CXCL3
		MAP3K7	CXCL5
		MAPK1	CXCL6
		MAPK10	CXCL8
		MAPK11	CYCS
		MAPK12	CYFIP1
		MAPK13	CYFIP2
		MAPK14	CYTH1
		MAPK3	CYTH2
		MAPK8	CYTH3
		MAPK9	CYTH4
		MYH10	EEF1A1
		MYH11	EEF1A2
		MYH14	EEF1G
		MYH9	EZR
		MYO10	F2
		MYO1B	F2R
		MYO1C	FADD
		MYO1D	FAS
		MYO1E	FASLG
		MYO1F	FCGR2A
		MYO1G	FOS
		MYO1H	FYN
		MYO5A	GAPDH
		MYO5B	GNA12
		MYO6	GNA13
		NAIP	GNAI1
		NCK1	GNAI2
		NCK2	GNAI3
		NCKAP1	HBS1L
		NCKAP1L	HCLS1
		NCL	HSF1
		NFKB1	HSPA1A
		NFKBIA	HSPA1B
		NFKBIB	HSPA1L
		NHERF1	HSPA2
		NLRP3	HSPA6
		NLRP4	HSPD1
		OCLN	IKBKB
		PAK1	IKBKG
		PAK2	IL10
		PAK3	IL12A
		PTPN11	IL18
		PTPN6	IL1A
		PYCARD	IL1B
		RAB1A	IL1R1
		RAC1	IL23A
		RELA	IL6
		RHOA	IRAK1
		RIPK1	IRAK4
		ROCK1	IRF1
		ROCK2	IRF3
		RPS3	ITGA5
		SEC24A	ITGAM
		SEC24B	ITGB1
		SEC24C	ITGB2
		SEC24D	JUN
		SRC	LOC102723407
		TAB1	LPAR1
		TAB2	LPAR2
		TAB3	LPAR4
		TIRAP	LPAR5
		TJP1	LY96
		TLR4	MAP3K7
		TLR5	MAPK1
		TMBIM6	MAPK10
		TMED10	MAPK11
		TNFRSF10A	MAPK12
		TNFRSF10B	MAPK13
		TNFRSF1A	MAPK14
		TNFSF10	MAPK3
		TRADD	MAPK8
		TRAF2	MAPK9
		TRAF6	MYH10
		TUBA1A	MYH11
		TUBA1B	MYH14
		TUBA1C	MYH9
		TUBA3C	MYO10
		TUBA3D	MYO1B
		TUBA3E	MYO1C
		TUBA4A	MYO1D
		TUBA8	MYO1E
		TUBAL3	MYO1F
		TUBB	MYO1G
		TUBB1	MYO1H
		TUBB2B	MYO5A
		TUBB3	MYO5B
		TUBB4A	MYO6
		TUBB4B	NAIP
		TUBB6	NCK1
		TUBB8	NCK2
		WASF1	NCKAP1
		WASF2	NCKAP1L
		WASL	NCL
		WIPF1	NFKB1
		WIPF2	NFKB2
		WIPF3	NFKBIA
			NFKBIB
			NHERF1
			NLRC4
			NLRP3
			NLRP4
			NOD1
			NOS2
			OCLN
			PAK1
			PAK2
			PAK3
			PTPN11
			PTPN6
			PYCARD
			RAB1A
			RAB1B
			RAC1
			RELA
			RHOA
			RIPK1
			ROCK1
			ROCK2
			RPS3
			SAR1A
			SAR1B
			SEC22B
			SEC24A
			SEC24B
			SEC24C
			SEC24D
			SERPING1
			SFTPA1
			SFTPA2
			SRC
			TAB1
			TAB2
			TAB3
			TICAM1
			TIRAP
			TJP1
			TLR2
			TLR4
			TLR5
			TMBIM6
			TMED10
			TNFRSF10A
			TNFRSF10B
			TNFRSF1A
			TNFSF10
			TRADD
			TRAF2
			TRAF6
			TUBA1A
			TUBA1B
			TUBA1C
			TUBA3C
			TUBA3D
			TUBA3E
			TUBA4A
			TUBA8
			TUBAL3
			TUBB
			TUBB1
			TUBB2B
			TUBB3
			TUBB4A
			TUBB4B
			TUBB6
			TUBB8
			VCP
			WASF1
			WASF2
			WASL
			WIPF1
			WIPF2
			WIPF3

## Sheet: NF-kappa B signaling pathway
NF-kappa B signaling pathway
BCL2A1
LTA
LYN
MYD88
TICAM2
TNF
VCAM1
ATM
BCL10
BCL2
BCL2L1
BIRC2
BIRC3
BLNK
BTK
CARD10
CARD11
CARD14
CCL13
CCL19
CCL21
CCL4
CCL4L1
CCL4L2
CD14
CD40
CD40LG
CFLAR
CHUK
CSNK2A1
CSNK2A2
CSNK2A3
CSNK2B
CXCL1
CXCL12
CXCL2
CXCL3
CXCL8
CYLD
EDA
EDA2R
EDAR
EDARADD
ERC1
GADD45A
GADD45B
GADD45G
ICAM1
IKBKB
IKBKG
IL1B
IL1R1
IRAK1
IRAK4
LAT
LBP
LCK
LOC102723407
LTB
LTBR
LY96
MALT1
MAP3K14
MAP3K7
NFKB1
NFKB2
NFKBIA
PARP1
PIAS4
PIDD1
PLAU
PLCG1
PLCG2
PRKCB
PRKCQ
PTGS2
RELA
RELB
RIGI
RIPK1
SYK
TAB1
TAB2
TAB3
TICAM1
TIRAP
TLR4
TNFAIP3
TNFRSF11A
TNFRSF13C
TNFRSF1A
TNFSF11
TNFSF13B
TNFSF14
TRADD
TRAF1
TRAF2
TRAF3
TRAF5
TRAF6
TRIM25
UBE2I
XIAP
ZAP70

## Sheet: Hematopoietic cells
Hematopoietic cell lineage
FCGR1A
ITGA1
ITGA6
KITLG
TFRC
TNF
ANPEP
CD14
CD19
CD1A
CD1B
CD1C
CD1D
CD1E
CD2
CD22
CD24
CD33
CD34
CD36
CD37
CD38
CD3D
CD3E
CD3G
CD4
CD44
CD5
CD55
CD59
CD7
CD8A
CD8B
CD8B2
CD9
CR1
CR1L
CR2
CSF1
CSF1R
CSF2
CSF2RA
CSF3
CSF3R
DNTT
EPO
EPOR
FCER2
FLT3
FLT3LG
GP1BA
GP1BB
GP5
GP9
GYPA
HLA-DMA
HLA-DMB
HLA-DOA
HLA-DOB
HLA-DPA1
HLA-DPB1
HLA-DQA1
HLA-DQA2
HLA-DQB1
HLA-DRA
HLA-DRB1
HLA-DRB3
HLA-DRB4
HLA-DRB5
IL11
IL11RA
IL1A
IL1B
IL1R1
IL1R2
IL2RA
IL3
IL3RA
IL4
IL4R
IL5
IL5RA
IL6
IL6R
IL7
IL7R
IL9R
ITGA2
ITGA2B
ITGA3
ITGA4
ITGA5
ITGAM
ITGB3
KIT
LOC102723407
MME
MS4A1
THPO

## Sheet: Innate immune sensing
RIG-I-like receptor signaling pathway	Cytosolic DNA-sensing pathway	Toll-like receptor signaling pathway	Total
CXCL10	AIM2	CXCL10	AIM2
IL12B	CXCL10	CXCL11	CXCL10
TBKBP1	POLR3H	IL12B	CXCL11
TNF	RIPK3	MYD88	IL12B
ATG12	ADAR	TICAM2	MYD88
ATG5	CASP1	TNF	POLR3H
AZI2	CCL4	AKT1	RIPK3
CASP10	CCL4L1	AKT2	TBKBP1
CASP8	CCL4L2	AKT3	TICAM2
CHUK	CCL5	CASP8	TNF
CXCL8	CGAS	CCL3	ADAR
CYLD	CHUK	CCL3L1	AKT1
DDX3X	IFNA1	CCL3L3	AKT2
DHX58	IFNA10	CCL4	AKT3
FADD	IFNA13	CCL4L1	ATG12
IFIH1	IFNA14	CCL4L2	ATG5
IFNA1	IFNA16	CCL5	AZI2
IFNA10	IFNA17	CD14	CASP1
IFNA13	IFNA2	CD40	CASP10
IFNA14	IFNA21	CD80	CASP8
IFNA16	IFNA4	CD86	CCL3
IFNA17	IFNA5	CHUK	CCL3L1
IFNA2	IFNA6	CTSK	CCL3L3
IFNA21	IFNA7	CXCL8	CCL4
IFNA4	IFNA8	CXCL9	CCL4L1
IFNA5	IFNB1	FADD	CCL4L2
IFNA6	IKBKB	FOS	CCL5
IFNA7	IKBKE	IFNA1	CD14
IFNA8	IKBKG	IFNA10	CD40
IFNB1	IL18	IFNA13	CD80
IFNE	IL1B	IFNA14	CD86
IFNK	IL33	IFNA16	CGAS
IFNW1	IL6	IFNA17	CHUK
IKBKB	IRF3	IFNA2	CTSK
IKBKE	IRF7	IFNA21	CXCL8
IKBKG	MAVS	IFNA4	CXCL9
IL12A	NFKB1	IFNA5	CYLD
IRF3	NFKBIA	IFNA6	DDX3X
IRF7	NFKBIB	IFNA7	DHX58
ISG15	POLR1C	IFNA8	FADD
MAP3K1	POLR1D	IFNAR1	FOS
MAP3K7	POLR2E	IFNAR2	IFIH1
MAPK10	POLR2F	IFNB1	IFNA1
MAPK11	POLR2H	IKBKB	IFNA10
MAPK12	POLR2K	IKBKE	IFNA13
MAPK13	POLR2L	IKBKG	IFNA14
MAPK14	POLR3A	IL12A	IFNA16
MAPK8	POLR3B	IL1B	IFNA17
MAPK9	POLR3C	IL6	IFNA2
MAVS	POLR3D	IRAK1	IFNA21
NFKB1	POLR3E	IRAK4	IFNA4
NFKBIA	POLR3F	IRF3	IFNA5
NFKBIB	POLR3G	IRF5	IFNA6
NLRX1	POLR3GL	IRF7	IFNA7
OTUD5	POLR3K	JUN	IFNA8
PIN1	PYCARD	LBP	IFNAR1
RELA	RELA	LY96	IFNAR2
RIGI	RIGI	MAP2K1	IFNB1
RIPK1	RIPK1	MAP2K2	IFNE
RNF125	STING1	MAP2K3	IFNK
SIKE1	TBK1	MAP2K4	IFNW1
STING1	TREX1	MAP2K6	IKBKB
TANK	ZBP1	MAP2K7	IKBKE
TBK1		MAP3K7	IKBKG
TKFC		MAP3K8	IL12A
TRADD		MAPK1	IL18
TRAF2		MAPK10	IL1B
TRAF3		MAPK11	IL33
TRAF6		MAPK12	IL6
TRIM25		MAPK13	IRAK1
		MAPK14	IRAK4
		MAPK3	IRF3
		MAPK8	IRF5
		MAPK9	IRF7
		NFKB1	ISG15
		NFKBIA	JUN
		PIK3CA	LBP
		PIK3CB	LY96
		PIK3CD	MAP2K1
		PIK3R1	MAP2K2
		PIK3R2	MAP2K3
		PIK3R3	MAP2K4
		RAC1	MAP2K6
		RELA	MAP2K7
		RIPK1	MAP3K1
		SPP1	MAP3K7
		STAT1	MAP3K8
		TAB1	MAPK1
		TAB2	MAPK10
		TBK1	MAPK11
		TICAM1	MAPK12
		TIRAP	MAPK13
		TLR1	MAPK14
		TLR2	MAPK3
		TLR3	MAPK8
		TLR4	MAPK9
		TLR5	MAVS
		TLR6	NFKB1
		TLR7	NFKBIA
		TLR8	NFKBIB
		TLR9	NLRX1
		TOLLIP	OTUD5
		TRAF3	PIK3CA
		TRAF6	PIK3CB
			PIK3CD
			PIK3R1
			PIK3R2
			PIK3R3
			PIN1
			POLR1C
			POLR1D
			POLR2E
			POLR2F
			POLR2H
			POLR2K
			POLR2L
			POLR3A
			POLR3B
			POLR3C
			POLR3D
			POLR3E
			POLR3F
			POLR3G
			POLR3GL
			POLR3K
			PYCARD
			RAC1
			RELA
			RIGI
			RIPK1
			RNF125
			SIKE1
			SPP1
			STAT1
			STING1
			TAB1
			TAB2
			TANK
			TBK1
			TICAM1
			TIRAP
			TKFC
			TLR1
			TLR2
			TLR3
			TLR4
			TLR5
			TLR6
			TLR7
			TLR8
			TLR9
			TOLLIP
			TRADD
			TRAF2
			TRAF3
			TRAF6
			TREX1
			TRIM25
			ZBP1

## Sheet: IL-17 signaling pathway
IL-17 signaling pathway
CCL2
CCL20
CCL7
CXCL10
TNF
ANAPC5
CASP3
CASP8
CCL11
CCL17
CEBPB
CHUK
CSF2
CSF3
CXCL1
CXCL2
CXCL3
CXCL5
CXCL6
CXCL8
DEFB4A
DEFB4B
ELAVL1
FADD
FOS
FOSB
FOSL1
GSK3B
HSP90AA1
HSP90AB1
HSP90B1
IFNG
IKBKB
IKBKE
IKBKG
IL13
IL17A
IL17B
IL17C
IL17D
IL17F
IL17RA
IL17RB
IL17RC
IL17RE
IL1B
IL25
IL4
IL5
IL6
JUN
JUND
LCN2
MAP3K7
MAPK1
MAPK10
MAPK11
MAPK12
MAPK13
MAPK14
MAPK15
MAPK3
MAPK4
MAPK6
MAPK7
MAPK8
MAPK9
MMP1
MMP13
MMP3
MMP9
MUC5AC
MUC5B
NFKB1
NFKBIA
PTGS2
RELA
S100A7
S100A7A
S100A8
S100A9
SRSF1
TAB2
TAB3
TBK1
TNFAIP3
TRADD
TRAF2
TRAF3
TRAF3IP2
TRAF4
TRAF5
TRAF6
USP25

## Sheet: Extracellular matrix interactio
Focal adhesion	Regulation of actin cytoskeleton	Dilated cardiomyopathy	Hypertrophic cardiomyopathy	Total
ACTG1	ACTG1	ACTG1	ACTG1	ACTG1
HGF	ARHGEF6	ITGA1	EDN1	ARHGEF6
ITGA1	CHRM5	ITGA10	ITGA1	CHRM5
ITGA10	ITGA1	ITGA6	ITGA10	EDN1
ITGA6	ITGA10	TNF	ITGA6	HGF
PDGFRA	ITGA6	ACTB	TNF	ITGA1
TNC	PDGFRA	ACTC1	ATP2A1	ITGA10
ACTB	SCIN	ADCY1	ATP2A2	ITGA6
ACTN1	ABI2	ADCY2	ATP2A3	PDGFRA
ACTN4	ACTB	ADCY3	ACTC1	SCIN
AKT1	ACTN1	ADCY4	ACTB	TNC
AKT2	ACTN4	ADCY5	ACE	TNF
AKT3	ACTR2	ADCY6	AGT	ABI2
ARHGAP35	ACTR3	ADCY7	CACNA2D1	ACE
ARHGAP5	ACTR3B	ADCY8	CACNA2D2	ACTB
BAD	ACTR3C	ADCY9	CACNA2D3	ACTC1
BCAR1	AKT1	ADRB1	CACNA2D4	ACTN1
BCL2	AKT2	AGT	CACNB1	ACTN4
BIRC2	AKT3	ATP2A1	CACNB2	ACTR2
BIRC3	APC	ATP2A2	CACNB3	ACTR3
BRAF	APC2	ATP2A3	CACNB4	ACTR3B
BUB1B-PAK6	ARAF	CACNA1C	CACNG1	ACTR3C
CAPN2	ARHGAP35	CACNA1D	CACNG2	ADCY1
CAV1	ARHGEF1	CACNA1F	CACNG3	ADCY2
CAV2	ARHGEF12	CACNA1S	CACNG4	ADCY3
CAV3	ARHGEF4	CACNA2D1	CACNG5	ADCY4
CCND1	ARHGEF7	CACNA2D2	CACNG6	ADCY5
CCND2	ARPC1A	CACNA2D3	CACNG7	ADCY6
CCND3	ARPC1B	CACNA2D4	CACNG8	ADCY7
CDC42	ARPC2	CACNB1	CACNA1C	ADCY8
CHAD	ARPC3	CACNB2	CACNA1D	ADCY9
COL1A1	ARPC4	CACNB3	CACNA1F	ADRB1
COL1A2	ARPC5	CACNB4	CACNA1S	AGT
COL2A1	ARPC5L	CACNG1	DES	AKT1
COL4A1	BAIAP2	CACNG2	DAG1	AKT2
COL4A2	BCAR1	CACNG3	DMD	AKT3
COL4A3	BDKRB1	CACNG4	EMD	APC
COL4A4	BDKRB2	CACNG5	IGF1	APC2
COL4A5	BRAF	CACNG6	ITGA11	ARAF
COL4A6	BRK1	CACNG7	ITGA2	ARHGAP35
COL6A1	BUB1B-PAK6	CACNG8	ITGA2B	ARHGAP5
COL6A2	C5	DAG1	ITGA3	ARHGEF1
COL6A3	C6	DES	ITGA4	ARHGEF12
COL6A5	C7	DMD	ITGA5	ARHGEF4
COL6A6	C8A	EMD	ITGA7	ARHGEF7
COL9A1	C8B	GNAS	ITGA8	ARPC1A
COL9A2	C8G	IGF1	ITGA9	ARPC1B
COL9A3	C9	ITGA11	ITGAV	ARPC2
COMP	CDC42	ITGA2	ITGB1	ARPC3
CRK	CFL1	ITGA2B	ITGB3	ARPC4
CRKL	CFL2	ITGA3	ITGB4	ARPC5
CTNNB1	CHRM1	ITGA4	ITGB5	ARPC5L
DIAPH1	CHRM2	ITGA5	ITGB6	ATP2A1
DOCK1	CHRM3	ITGA7	ITGB7	ATP2A2
EGF	CHRM4	ITGA8	ITGB8	ATP2A3
EGFR	CRK	ITGA9	IL6	BAD
ELK1	CRKL	ITGAV	LMNA	BAIAP2
ERBB2	CXCL12	ITGB1	LAMA1	BCAR1
FLNA	CXCR4	ITGB3	LAMA2	BCL2
FLNB	CYFIP1	ITGB4	MYBPC3	BDKRB1
FLNC	CYFIP2	ITGB5	MYH6	BDKRB2
FLT1	DIAPH1	ITGB6	MYH7	BIRC2
FLT4	DIAPH2	ITGB7	MYL2	BIRC3
FN1	DIAPH3	ITGB8	MYL3	BRAF
FYN	DOCK1	LAMA1	PRKAA1	BRK1
GRB2	EGF	LAMA2	PRKAA2	BUB1B-PAK6
GSK3B	EGFR	LMNA	PRKAB1	C5
HRAS	ENAH	LOC102723407	PRKAB2	C6
IBSP	EZR	MYBPC3	PRKAG1	C7
IGF1	F2	MYH6	PRKAG2	C8A
IGF1R	F2R	MYH7	PRKAG3	C8B
ILK	FGD1	MYL2	RYR2	C8G
ITGA11	FGD3	MYL3	SGCA	C9
ITGA2	FGF1	PLN	SGCB	CACNA1C
ITGA2B	FGF10	PRKACA	SGCD	CACNA1D
ITGA3	FGF16	PRKACB	SGCG	CACNA1F
ITGA4	FGF17	PRKACG	SLC8A1	CACNA1S
ITGA5	FGF18	RYR2	SLC8A2	CACNA2D1
ITGA7	FGF19	SGCA	SLC8A3	CACNA2D2
ITGA8	FGF2	SGCB	TTN	CACNA2D3
ITGA9	FGF20	SGCD	TGFB1	CACNA2D4
ITGAV	FGF21	SGCG	TGFB2	CACNB1
ITGB1	FGF22	SLC8A1	TGFB3	CACNB2
ITGB3	FGF23	SLC8A2	TPM1	CACNB3
ITGB4	FGF3	SLC8A3	TPM2	CACNB4
ITGB5	FGF4	TGFB1	TPM3	CACNG1
ITGB6	FGF5	TGFB2	TPM4	CACNG2
ITGB7	FGF6	TGFB3	TNNC1	CACNG3
ITGB8	FGF7	TNNC1	TNNI3	CACNG4
JUN	FGF8	TNNI3	TNNT2	CACNG5
KDR	FGF9	TNNT2		CACNG6
LAMA1	FGFR1	TPM1		CACNG7
LAMA2	FGFR2	TPM2		CACNG8
LAMA3	FGFR3	TPM3		CAPN2
LAMA4	FGFR4	TPM4		CAV1
LAMA5	FN1	TTN		CAV2
LAMB1	GIT1			CAV3
LAMB2	GNA12			CCND1
LAMB3	GNA13			CCND2
LAMB4	GNG12			CCND3
LAMC1	GSN			CDC42
LAMC2	HRAS			CFL1
LAMC3	INS			CFL2
MAP2K1	INSRR			CHAD
MAPK1	IQGAP1			CHRM1
MAPK10	IQGAP2			CHRM2
MAPK3	IQGAP3			CHRM3
MAPK8	ITGA11			CHRM4
MAPK9	ITGA2			COL1A1
MET	ITGA2B			COL1A2
MYL10	ITGA3			COL2A1
MYL11	ITGA4			COL4A1
MYL12A	ITGA5			COL4A2
MYL12B	ITGA7			COL4A3
MYL2	ITGA8			COL4A4
MYL5	ITGA9			COL4A5
MYL7	ITGAD			COL4A6
MYL9	ITGAE			COL6A1
MYLK	ITGAL			COL6A2
MYLK2	ITGAM			COL6A3
MYLK3	ITGAV			COL6A5
MYLK4	ITGAX			COL6A6
PAK1	ITGB1			COL9A1
PAK2	ITGB2			COL9A2
PAK3	ITGB3			COL9A3
PAK4	ITGB4			COMP
PAK5	ITGB5			CRK
PAK6	ITGB6			CRKL
PARVA	ITGB7			CTNNB1
PARVB	ITGB8			CXCL12
PARVG	KNG1			CXCR4
PDGFA	KRAS			CYFIP1
PDGFB	LIMK1			CYFIP2
PDGFC	LIMK2			DAG1
PDGFD	LPAR1			DES
PDGFRB	LPAR2			DIAPH1
PDPK1	LPAR4			DIAPH2
PGF	LPAR5			DIAPH3
PIK3CA	MAP2K1			DMD
PIK3CB	MAP2K2			DOCK1
PIK3CD	MAPK1			EGF
PIK3R1	MAPK3			EGFR
PIK3R2	MOS			ELK1
PIK3R3	MRAS			EMD
PIP5K1A	MSN			ENAH
PIP5K1B	MYH10			ERBB2
PIP5K1C	MYH11			EZR
PPP1CA	MYH14			F2
PPP1CB	MYH9			F2R
PPP1CC	MYL10			FGD1
PPP1R12A	MYL11			FGD3
PPP1R12B	MYL12A			FGF1
PPP1R12C	MYL12B			FGF10
PRKCA	MYL2			FGF16
PRKCB	MYL5			FGF17
PRKCG	MYL7			FGF18
PTEN	MYL9			FGF19
PTK2	MYLK			FGF2
PXN	MYLK2			FGF20
RAC1	MYLK3			FGF21
RAC2	MYLK4			FGF22
RAC3	NCKAP1			FGF23
RAF1	NCKAP1L			FGF3
RAP1A	NRAS			FGF4
RAP1B	PAK1			FGF5
RAPGEF1	PAK2			FGF6
RASGRF1	PAK3			FGF7
RELN	PAK4			FGF8
RHOA	PAK5			FGF9
ROCK1	PAK6			FGFR1
ROCK2	PDGFA			FGFR2
SHC1	PDGFB			FGFR3
SHC2	PDGFC			FGFR4
SHC3	PDGFD			FLNA
SHC4	PDGFRB			FLNB
SOS1	PFN1			FLNC
SOS2	PFN2			FLT1
SPP1	PFN3			FLT4
SRC	PFN4			FN1
THBS1	PIK3CA			FYN
THBS2	PIK3CB			GIT1
THBS3	PIK3CD			GNA12
THBS4	PIK3R1			GNA13
TLN1	PIK3R2			GNAS
TLN2	PIK3R3			GNG12
TNN	PIKFYVE			GRB2
TNR	PIP4K2A			GSK3B
TNXB	PIP4K2B			GSN
VASP	PIP4K2C			HRAS
VAV1	PIP5K1A			IBSP
VAV2	PIP5K1B			IGF1
VAV3	PIP5K1C			IGF1R
VCL	PPP1CA			IL6
VEGFA	PPP1CB			ILK
VEGFB	PPP1CC			INS
VEGFC	PPP1R12A			INSRR
VEGFD	PPP1R12B			IQGAP1
VTN	PPP1R12C			IQGAP2
VWF	PTK2			IQGAP3
XIAP	PXN			ITGA11
ZYX	RAC1			ITGA2
	RAC2			ITGA2B
	RAC3			ITGA3
	RAF1			ITGA4
	RDX			ITGA5
	RGCC			ITGA7
	RHOA			ITGA8
	ROCK1			ITGA9
	ROCK2			ITGAD
	RRAS			ITGAE
	RRAS2			ITGAL
	SLC9A1			ITGAM
	SOS1			ITGAV
	SOS2			ITGAX
	SPATA13			ITGB1
	SRC			ITGB2
	SSH1			ITGB3
	SSH2			ITGB4
	SSH3			ITGB5
	TIAM1			ITGB6
	TMSB4X			ITGB7
	TMSB4Y			ITGB8
	VAV1			JUN
	VAV2			KDR
	VAV3			KNG1
	VCL			KRAS
	WASF1			LAMA1
	WASF2			LAMA2
	WASL			LAMA3
				LAMA4
				LAMA5
				LAMB1
				LAMB2
				LAMB3
				LAMB4
				LAMC1
				LAMC2
				LAMC3
				LIMK1
				LIMK2
				LMNA
				LOC102723407
				LPAR1
				LPAR2
				LPAR4
				LPAR5
				MAP2K1
				MAP2K2
				MAPK1
				MAPK10
				MAPK3
				MAPK8
				MAPK9
				MET
				MOS
				MRAS
				MSN
				MYBPC3
				MYH10
				MYH11
				MYH14
				MYH6
				MYH7
				MYH9
				MYL10
				MYL11
				MYL12A
				MYL12B
				MYL2
				MYL3
				MYL5
				MYL7
				MYL9
				MYLK
				MYLK2
				MYLK3
				MYLK4
				NCKAP1
				NCKAP1L
				NRAS
				PAK1
				PAK2
				PAK3
				PAK4
				PAK5
				PAK6
				PARVA
				PARVB
				PARVG
				PDGFA
				PDGFB
				PDGFC
				PDGFD
				PDGFRB
				PDPK1
				PFN1
				PFN2
				PFN3
				PFN4
				PGF
				PIK3CA
				PIK3CB
				PIK3CD
				PIK3R1
				PIK3R2
				PIK3R3
				PIKFYVE
				PIP4K2A
				PIP4K2B
				PIP4K2C
				PIP5K1A
				PIP5K1B
				PIP5K1C
				PLN
				PPP1CA
				PPP1CB
				PPP1CC
				PPP1R12A
				PPP1R12B
				PPP1R12C
				PRKAA1
				PRKAA2
				PRKAB1
				PRKAB2
				PRKACA
				PRKACB
				PRKACG
				PRKAG1
				PRKAG2
				PRKAG3
				PRKCA
				PRKCB
				PRKCG
				PTEN
				PTK2
				PXN
				RAC1
				RAC2
				RAC3
				RAF1
				RAP1A
				RAP1B
				RAPGEF1
				RASGRF1
				RDX
				RELN
				RGCC
				RHOA
				ROCK1
				ROCK2
				RRAS
				RRAS2
				RYR2
				SGCA
				SGCB
				SGCD
				SGCG
				SHC1
				SHC2
				SHC3
				SHC4
				SLC8A1
				SLC8A2
				SLC8A3
				SLC9A1
				SOS1
				SOS2
				SPATA13
				SPP1
				SRC
				SSH1
				SSH2
				SSH3
				TGFB1
				TGFB2
				TGFB3
				THBS1
				THBS2
				THBS3
				THBS4
				TIAM1
				TLN1
				TLN2
				TMSB4X
				TMSB4Y
				TNN
				TNNC1
				TNNI3
				TNNT2
				TNR
				TNXB
				TPM1
				TPM2
				TPM3
				TPM4
				TTN
				VASP
				VAV1
				VAV2
				VAV3
				VCL
				VEGFA
				VEGFB
				VEGFC
				VEGFD
				VTN
				VWF
				WASF1
				WASF2
				WASL
				XIAP
				ZYX

## Sheet: Viral infection
Influenza A
ACTG1
CCL2
CXCL10
FDPS
IL12B
MX2
MYD88
TNF
ACTB
ADAR
AKT1
AKT2
AKT3
APAF1
BAK1
BAX
BCL2L2-PABPN1
BID
CALCOCO2
CASP1
CASP3
CASP8
CASP9
CCL5
CCND3
CDK4
CDK6
CHUK
CIITA
CPSF4
CPSF4L
CREBBP
CXCL8
CYCS
DNAJB1
DNAJC3
EIF2AK2
EIF2S1
EP300
FADD
FAS
FASLG
HLA-DMA
HLA-DMB
HLA-DOA
HLA-DOB
HLA-DPA1
HLA-DPB1
HLA-DQA1
HLA-DQA2
HLA-DQB1
HLA-DRA
HLA-DRB1
HLA-DRB3
HLA-DRB4
HLA-DRB5
HNRNPUL1
ICAM1
IFIH1
IFNA1
IFNA10
IFNA13
IFNA14
IFNA16
IFNA17
IFNA2
IFNA21
IFNA4
IFNA5
IFNA6
IFNA7
IFNA8
IFNAR1
IFNAR2
IFNB1
IFNG
IFNGR1
IFNGR2
IKBKB
IKBKE
IKBKG
IL12A
IL18
IL1A
IL1B
IL33
IL6
IRAK4
IRF3
IRF7
IRF9
JAK1
JAK2
KPNA1
KPNA2
KPNA5
KPNA6
KPNA7
MAP2K1
MAP2K2
MAPK1
MAPK3
MAVS
MX1
NFKB1
NFKBIA
NFKBIB
NLRP3
NLRX1
NUP98
NXF1
NXF2
NXF2B
NXF3
NXT1
NXT2
OAS1
OAS2
OAS3
PABPN1
PABPN1L
PIK3CA
PIK3CB
PIK3CD
PIK3R1
PIK3R2
PIK3R3
PLG
PML
PRKCA
PRKCB
PRSS1
PRSS2
PRSS3
PYCARD
RAB11A
RAB11B
RAE1
RAF1
RELA
RIGI
RNASEL
RSAD2
SLC25A31
SLC25A4
SLC25A5
SLC25A6
SOCS3
STAT1
STAT2
TBK1
TICAM1
TLR3
TLR4
TLR7
TMPRSS11D
TMPRSS2
TMPRSS4
TNFRSF10A
TNFRSF10B
TNFRSF1A
TNFSF10
TPSAB1
TPSB2
TPSD1
TRADD
TRAF3
TRIM25
TYK2
VDAC1
XPO1

[truncated: 2 more sheets: Viral regulation of cytokines n, Metabolic pathways]
