# Supplementary material for: Peculiar transcriptional reprogramming with functional impairment of dendritic cells upon exposure to transformed HTLV-1-infected cells
Source: bioRxiv preprint, doi:10.1101/2024.05.21.592359, version 3 (2024-07-09)
Supplement: Supplemental Table 6 [file 592359_file14.xlsx]

## Sheet: Glycan metabolism
Glycosaminoglycan biosynthesis - heparan sulfate / heparin
EXTL1
GLCE
HS6ST1
XYLT2
B3GALT6
B3GAT3
B4GALT7
EXT1
EXT2
EXTL2
EXTL3
HS2ST1
HS3ST1
HS3ST2
HS3ST3A1
HS3ST3B1
HS3ST5
HS6ST2
HS6ST3
NDST1
NDST2
NDST3
NDST4
XYLT1

## Sheet: Protein biosynthesis and metabo
Protein digestion and absorption	Biosynthesis of amino acids	Total
ATP1B1	ABHD14A-ACY1	ATP1B1
COL13A1	ACY1	ABHD14A-ACY1
COL22A1	BCAT1	ACY1
COL23A1	CBS	BCAT1
COL27A1	CPS1	CBS
COL4A1	CTH	COL13A1
COL4A2	ENO2	COL22A1
COL4A6	PYCR1	COL23A1
COL5A1	ACO1	COL27A1
COL6A1	ACO2	COL4A1
COL7A1	ALDH18A1	COL4A2
FXYD2	ALDOA	COL4A6
KCNQ1	ALDOB	COL5A1
SLC16A10	ALDOC	COL6A1
SLC3A2	ARG1	COL7A1
SLC9A3	ARG2	CPS1
ACE2	ASL	CTH
ATP1A1	ASNS	ENO2
ATP1A2	ASS1	FXYD2
ATP1A3	BCAT2	KCNQ1
ATP1A4	CS	PYCR1
ATP1B2	ENO1	SLC16A10
ATP1B3	ENO3	SLC3A2
ATP1B4	ENO4	SLC9A3
CELA2A	GAPDH	ACE2
CELA2B	GLUL	ACO1
CELA3A	GOT1	ACO2
CELA3B	GOT1L1	ALDH18A1
COL10A1	GOT2	ALDOA
COL11A1	GPT	ALDOB
COL11A2	GPT2	ALDOC
COL12A1	IDH1	ARG1
COL14A1	IDH2	ARG2
COL15A1	IDH3A	ASL
COL16A1	IDH3B	ASNS
COL17A1	IDH3G	ASS1
COL18A1	LOC102724560	ATP1A1
COL19A1	MAT1A	ATP1A2
COL1A1	MAT2A	ATP1A3
COL1A2	MAT2B	ATP1A4
COL20A1	MTR	ATP1B2
COL21A1	NAGS	ATP1B3
COL24A1	OTC	ATP1B4
COL25A1	PAH	BCAT2
COL26A1	PC	CELA2A
COL28A1	PFKL	CELA2B
COL2A1	PFKM	CELA3A
COL3A1	PFKP	CELA3B
COL4A3	PGAM1	COL10A1
COL4A4	PGAM2	COL11A1
COL4A5	PGAM4	COL11A2
COL5A2	PGK1	COL12A1
COL5A3	PGK2	COL14A1
COL6A2	PHGDH	COL15A1
COL6A3	PKLR	COL16A1
COL6A5	PKM	COL17A1
COL6A6	PRPS1	COL18A1
COL8A1	PRPS1L1	COL19A1
COL8A2	PRPS2	COL1A1
COL9A1	PSAT1	COL1A2
COL9A2	PSPH	COL20A1
COL9A3	PYCR2	COL21A1
CPA1	PYCR3	COL24A1
CPA2	RPE	COL25A1
CPA3	RPEL1	COL26A1
CPB1	RPIA	COL28A1
CPB2	SDS	COL2A1
CTRB1	SDSL	COL3A1
CTRB2	SHMT1	COL4A3
CTRL	SHMT2	COL4A4
DPP4	TALDO1	COL4A5
ELN	TKT	COL5A2
KCNE3	TKTL1	COL5A3
KCNJ13	TKTL2	COL6A2
KCNK5	TPI1	COL6A3
KCNN4		COL6A5
MEP1A		COL6A6
MEP1B		COL8A1
MME		COL8A2
PGA3		COL9A1
PGA4		COL9A2
PGA5		COL9A3
PRCP		CPA1
PRSS1		CPA2
PRSS2		CPA3
PRSS3		CPB1
SLC15A1		CPB2
SLC1A1		CS
SLC1A5		CTRB1
SLC36A1		CTRB2
SLC36A2		CTRL
SLC36A3		DPP4
SLC36A4		ELN
SLC38A2		ENO1
SLC3A1		ENO3
SLC6A19		ENO4
SLC7A7		GAPDH
SLC7A8		GLUL
SLC7A9		GOT1
SLC8A1		GOT1L1
SLC8A2		GOT2
SLC8A3		GPT
XPNPEP2		GPT2
		IDH1
		IDH2
		IDH3A
		IDH3B
		IDH3G
		KCNE3
		KCNJ13
		KCNK5
		KCNN4
		LOC102724560
		MAT1A
		MAT2A
		MAT2B
		MEP1A
		MEP1B
		MME
		MTR
		NAGS
		OTC
		PAH
		PC
		PFKL
		PFKM
		PFKP
		PGA3
		PGA4
		PGA5
		PGAM1
		PGAM2
		PGAM4
		PGK1
		PGK2
		PHGDH
		PKLR
		PKM
		PRCP
		PRPS1
		PRPS1L1
		PRPS2
		PRSS1
		PRSS2
		PRSS3
		PSAT1
		PSPH
		PYCR2
		PYCR3
		RPE
		RPEL1
		RPIA
		SDS
		SDSL
		SHMT1
		SHMT2
		SLC15A1
		SLC1A1
		SLC1A5
		SLC36A1
		SLC36A2
		SLC36A3
		SLC36A4
		SLC38A2
		SLC3A1
		SLC6A19
		SLC7A7
		SLC7A8
		SLC7A9
		SLC8A1
		SLC8A2
		SLC8A3
		TALDO1
		TKT
		TKTL1
		TKTL2
		TPI1
		XPNPEP2

## Sheet: Endocrine and excretory system
Type II diabetes mellitus	AGE-RAGE signaling pathway in diabetic complications	Insulin signaling pathway	Proximal tubule bicarbonate reclamation	Endocrine and other factor-regulated calcium reabsorption	Parathyroid hormone synthesis, secretion and action	Total
CACNA1E	COL4A1	EIF4EBP1	ATP1B1	ATP1B1	ADCY1	ADCY1
INSR	COL4A2	FBP1	FXYD2	BDKRB2	GNA12	ATP1B1
IRS2	COL4A6	INPP5A	PCK2	ESR1	GNA13	BDKRB2
PDX1	IL1A	INSR	SLC9A3	FXYD2	GNAQ	CACNA1E
SLC2A4	SERPINE1	IRS2	AQP1	GNAQ	HBEGF	COL4A1
ABCC8	TGFB2	MAP2K1	ATP1A1	KL	KL	COL4A2
ADIPOQ	THBD	PCK2	ATP1A2	ADCY6	MAP2K1	COL4A6
CACNA1A	VEGFA	PPP1R3C	ATP1A3	ADCY9	MEF2D	EIF4EBP1
CACNA1B	AGER	SLC2A4	ATP1A4	AP2A1	MMP15	ESR1
CACNA1C	AGT	SORBS1	ATP1B2	AP2A2	MMP17	FBP1
CACNA1D	AGTR1	ACACA	ATP1B3	AP2B1	NR4A2	FXYD2
CACNA1G	AKT1	ACACB	ATP1B4	AP2M1	PDE4A	GNA12
GCK	AKT2	AKT1	CA2	AP2S1	RXRA	GNA13
HK1	AKT3	AKT2	CA4	ATP1A1	ADCY2	GNAQ
HK2	BAX	AKT3	GLS	ATP1A2	ADCY3	HBEGF
HK3	BCL2	ARAF	GLS2	ATP1A3	ADCY4	IL1A
HKDC1	CASP3	BAD	GLUD1	ATP1A4	ADCY5	INPP5A
IKBKB	CCL2	BRAF	GLUD2	ATP1B2	ADCY6	INSR
INS	CCND1	CALM1	MDH1	ATP1B3	ADCY7	IRS2
IRS1	CDC42	CALM2	PCK1	ATP1B4	ADCY8	KL
IRS4	CDK4	CALM3	SLC25A10	ATP2B1	ADCY9	MAP2K1
KCNJ11	CDKN1B	CALML3	SLC38A3	ATP2B2	AKAP13	MEF2D
MAFA	COL1A1	CALML4	SLC4A4	ATP2B3	ARAF	MMP15
MAPK1	COL1A2	CALML5		ATP2B4	ARHGEF1	MMP17
MAPK10	COL3A1	CALML6		CALB1	ARHGEF11	NR4A2
MAPK3	COL4A3	CBL		CLTA	ARRB1	PCK2
MAPK8	COL4A4	CBLB		CLTB	ARRB2	PDE4A
MAPK9	COL4A5	CRK		CLTC	ATF2	PDX1
MTOR	CXCL8	CRKL		CLTCL1	ATF4	PPP1R3C
PIK3CA	CYBB	EIF4E		DNM1	ATF6B	RXRA
PIK3CB	DIAPH1	EIF4E1B		DNM2	BCL2	SERPINE1
PIK3CD	EDN1	EIF4E2		DNM3	BGLAP	SLC2A4
PIK3R1	EGR1	ELK1		GNAS	BRAF	SLC9A3
PIK3R2	F3	EXOC7		KLK1	CASR	SORBS1
PIK3R3	FN1	FASN		KLK2	CDKN1A	TGFB2
PKLR	FOXO1	FBP2		PLCB1	CREB1	THBD
PKM	HRAS	FLOT1		PLCB2	CREB3	VEGFA
PRKCD	ICAM1	FLOT2		PLCB3	CREB3L1	ABCC8
PRKCE	IL1B	FOXO1		PLCB4	CREB3L2	ACACA
PRKCZ	IL6	G6PC1		PRKACA	CREB3L3	ACACB
SLC2A2	JAK2	G6PC2		PRKACB	CREB3L4	ADCY2
SOCS1	JUN	G6PC3		PRKACG	CREB5	ADCY3
SOCS2	KRAS	GCK		PRKCA	CYP24A1	ADCY4
SOCS3	MAPK1	GRB2		PRKCB	CYP27B1	ADCY5
SOCS4	MAPK10	GSK3B		PRKCG	EGFR	ADCY6
TNF	MAPK11	GYS1		PTH	EGR1	ADCY7
	MAPK12	GYS2		PTH1R	FGF23	ADCY8
	MAPK13	HK1		RAB11A	FGFR1	ADCY9
	MAPK14	HK2		SLC8A1	FOS	ADIPOQ
	MAPK3	HK3		SLC8A2	GATA3	AGER
	MAPK8	HKDC1		SLC8A3	GCM1	AGT
	MAPK9	HRAS		TRPV5	GCM2	AGTR1
	MMP2	IKBKB		VDR	GNA11	AKAP13
	NFATC1	INPPL1			GNAI1	AKT1
	NFKB1	INS			GNAI2	AKT2
	NOS3	IRS1			GNAI3	AKT3
	NOX1	IRS4			GNAS	AP2A1
	NOX4	KRAS			ITPR1	AP2A2
	NRAS	LIPE			ITPR2	AP2B1
	PIK3CA	MAP2K2			ITPR3	AP2M1
	PIK3CB	MAPK1			JUND	AP2S1
	PIK3CD	MAPK10			LRP5	AQP1
	PIK3R1	MAPK3			LRP6	ARAF
	PIK3R2	MAPK8			MAFB	ARHGEF1
	PIK3R3	MAPK9			MAPK1	ARHGEF11
	PIM1	MKNK1			MAPK3	ARRB1
	PLCB1	MKNK2			MEF2A	ARRB2
	PLCB2	MTOR			MEF2C	ATF2
	PLCB3	NRAS			MMP13	ATF4
	PLCB4	PCK1			MMP14	ATF6B
	PLCD1	PDE3B			MMP16	ATP1A1
	PLCD3	PDPK1			MMP24	ATP1A2
	PLCD4	PHKA1			MMP25	ATP1A3
	PLCE1	PHKA2			NACA	ATP1A4
	PLCG1	PHKB			NHERF1	ATP1B2
	PLCG2	PHKG1			PDE4B	ATP1B3
	PRKCA	PHKG2			PDE4C	ATP1B4
	PRKCB	PIK3CA			PDE4D	ATP2B1
	PRKCD	PIK3CB			PLCB1	ATP2B2
	PRKCE	PIK3CD			PLCB2	ATP2B3
	PRKCZ	PIK3R1			PLCB3	ATP2B4
	RAC1	PIK3R2			PLCB4	BAD
	RELA	PIK3R3			PLD1	BAX
	SELE	PKLR			PLD2	BCL2
	SMAD2	PPARGC1A			PRKACA	BGLAP
	SMAD3	PPP1CA			PRKACB	BRAF
	SMAD4	PPP1CB			PRKACG	CA2
	STAT1	PPP1CC			PRKCA	CA4
	STAT3	PPP1R3A			PRKCB	CACNA1A
	STAT5A	PPP1R3B			PRKCG	CACNA1B
	STAT5B	PPP1R3D			PTH	CACNA1C
	TGFB1	PPP1R3E			PTH1R	CACNA1D
	TGFB3	PPP1R3F			PTHLH	CACNA1G
	TGFBR1	PRKAA1			RAF1	CALB1
	TGFBR2	PRKAA2			RHOA	CALM1
	TNF	PRKAB1			RUNX2	CALM2
	VCAM1	PRKAB2			RXRB	CALM3
	VEGFB	PRKACA			RXRG	CALML3
	VEGFC	PRKACB			SLC34A1	CALML4
	VEGFD	PRKACG			SLC34A2	CALML5
		PRKAG1			SLC34A3	CALML6
		PRKAG2			SOST	CASP3
		PRKAG3			SP1	CASR
		PRKAR1A			TNFSF11	CBL
		PRKAR1B			TRPV5	CBLB
		PRKAR2A			VDR	CCL2
		PRKAR2B				CCND1
		PRKCI				CDC42
		PRKCZ				CDK4
		PTPN1				CDKN1A
		PTPRF				CDKN1B
		PYGB				CLTA
		PYGL				CLTB
		PYGM				CLTC
		RAF1				CLTCL1
		RAPGEF1				COL1A1
		RHEB				COL1A2
		RHOQ				COL3A1
		RPS6				COL4A3
		RPS6KB1				COL4A4
		RPS6KB2				COL4A5
		RPTOR				CREB1
		SH2B2				CREB3
		SHC1				CREB3L1
		SHC2				CREB3L2
		SHC3				CREB3L3
		SHC4				CREB3L4
		SOCS1				CREB5
		SOCS2				CRK
		SOCS3				CRKL
		SOCS4				CXCL8
		SOS1				CYBB
		SOS2				CYP24A1
		SREBF1				CYP27B1
		TRIP10				DIAPH1
		TSC1				DNM1
		TSC2				DNM2
						DNM3
						EDN1
						EGFR
						EGR1
						EIF4E
						EIF4E1B
						EIF4E2
						ELK1
						EXOC7
						F3
						FASN
						FBP2
						FGF23
						FGFR1
						FLOT1
						FLOT2
						FN1
						FOS
						FOXO1
						G6PC1
						G6PC2
						G6PC3
						GATA3
						GCK
						GCM1
						GCM2
						GLS
						GLS2
						GLUD1
						GLUD2
						GNA11
						GNAI1
						GNAI2
						GNAI3
						GNAS
						GRB2
						GSK3B
						GYS1
						GYS2
						HK1
						HK2
						HK3
						HKDC1
						HRAS
						ICAM1
						IKBKB
						IL1B
						IL6
						INPPL1
						INS
						IRS1
						IRS4
						ITPR1
						ITPR2
						ITPR3
						JAK2
						JUN
						JUND
						KCNJ11
						KLK1
						KLK2
						KRAS
						LIPE
						LRP5
						LRP6
						MAFA
						MAFB
						MAP2K2
						MAPK1
						MAPK10
						MAPK11
						MAPK12
						MAPK13
						MAPK14
						MAPK3
						MAPK8
						MAPK9
						MDH1
						MEF2A
						MEF2C
						MKNK1
						MKNK2
						MMP13
						MMP14
						MMP16
						MMP2
						MMP24
						MMP25
						MTOR
						NACA
						NFATC1
						NFKB1
						NHERF1
						NOS3
						NOX1
						NOX4
						NRAS
						PCK1
						PDE3B
						PDE4B
						PDE4C
						PDE4D
						PDPK1
						PHKA1
						PHKA2
						PHKB
						PHKG1
						PHKG2
						PIK3CA
						PIK3CB
						PIK3CD
						PIK3R1
						PIK3R2
						PIK3R3
						PIM1
						PKLR
						PKM
						PLCB1
						PLCB2
						PLCB3
						PLCB4
						PLCD1
						PLCD3
						PLCD4
						PLCE1
						PLCG1
						PLCG2
						PLD1
						PLD2
						PPARGC1A
						PPP1CA
						PPP1CB
						PPP1CC
						PPP1R3A
						PPP1R3B
						PPP1R3D
						PPP1R3E
						PPP1R3F
						PRKAA1
						PRKAA2
						PRKAB1
						PRKAB2
						PRKACA
						PRKACB
						PRKACG
						PRKAG1
						PRKAG2
						PRKAG3
						PRKAR1A
						PRKAR1B
						PRKAR2A
						PRKAR2B
						PRKCA
						PRKCB
						PRKCD
						PRKCE
						PRKCG
						PRKCI
						PRKCZ
						PTH
						PTH1R
						PTHLH
						PTPN1
						PTPRF
						PYGB
						PYGL
						PYGM
						RAB11A
						RAC1
						RAF1
						RAPGEF1
						RELA
						RHEB
						RHOA
						RHOQ
						RPS6
						RPS6KB1
						RPS6KB2
						RPTOR
						RUNX2
						RXRB
						RXRG
						SELE
						SH2B2
						SHC1
						SHC2
						SHC3
						SHC4
						SLC25A10
						SLC2A2
						SLC34A1
						SLC34A2
						SLC34A3
						SLC38A3
						SLC4A4
						SLC8A1
						SLC8A2
						SLC8A3
						SMAD2
						SMAD3
						SMAD4
						SOCS1
						SOCS2
						SOCS3
						SOCS4
						SOS1
						SOS2
						SOST
						SP1
						SREBF1
						STAT1
						STAT3
						STAT5A
						STAT5B
						TGFB1
						TGFB3
						TGFBR1
						TGFBR2
						TNF
						TNFSF11
						TRIP10
						TRPV5
						TSC1
						TSC2
						VCAM1
						VDR
						VEGFB
						VEGFC
						VEGFD

## Sheet: TGF-beta signaling pathway
TGF-beta signaling pathway
ACVR2A
BAMBI
BMP6
BMP7
CDKN2B
CHRD
INHBE
NBL1
TGFB2
ZFYVE16
ACVR1
ACVR1B
ACVR1C
ACVR2B
AMH
AMHR2
BMP2
BMP4
BMP5
BMP8A
BMP8B
BMPR1A
BMPR1B
BMPR2
CREBBP
CUL1
DCN
E2F4
E2F5
EP300
FBN1
FMOD
FST
GDF5
GDF6
GDF7
GREM1
GREM2
HAMP
HJV
ID1
ID2
ID3
ID4
IFNG
IGSF1
INHBA
INHBB
INHBC
LEFTY1
LEFTY2
LTBP1
MAPK1
MAPK3
MICOS10-NBL1
MYC
NEO1
NODAL
NOG
PITX2
PPP2CA
PPP2CB
PPP2R1A
PPP2R1B
RBL1
RBX1
RGMA
RGMB
RHOA
ROCK1
RPS6KB1
RPS6KB2
SKP1
SMAD1
SMAD2
SMAD3
SMAD4
SMAD5
SMAD6
SMAD7
SMAD9
SMURF1
SMURF2
SP1
TFDP1
TGFB1
TGFB3
TGFBR1
TGFBR2
TGIF1
TGIF2
THBS1
THSD4
TNF
ZFYVE9

## Sheet: Complement and coagulation casc
Complement and coagulation cascades
BDKRB2
C5AR1
C7
ITGB2
PLAT
PLAUR
SERPINE1
SERPINF2
THBD
A2M
BDKRB1
C1QA
C1QB
C1QC
C1R
C1S
C2
C3
C3AR1
C4A
C4B
C4BPA
C4BPB
C5
C6
C8A
C8B
C8G
C9
CD46
CD55
CD59
CFB
CFD
CFH
CFHR1
CFHR2
CFHR3
CFHR4
CFHR5
CFI
CLU
CPB2
CR1
CR1L
CR2
F10
F11
F12
F13A1
F13B
F2
F2R
F2RL2
F2RL3
F3
F5
F7
F8
F9
FGA
FGB
FGG
ITGAM
ITGAX
KLKB1
KNG1
MASP1
MASP2
MBL2
PLAU
PLG
PROC
PROCR
PROS1
SERPINA1
SERPINA5
SERPINB2
SERPINC1
SERPIND1
SERPINE2
SERPING1
TFPI
VSIG4
VTN
VWF

## Sheet: Bile secretion
Bile secretion
ABCG2
ADCY1
ATP1B1
FXYD2
RXRA
SCARB1
SLC9A3
SLCO1B3
ABCB1
ABCB11
ABCB4
ABCC2
ABCC3
ABCC4
ABCG5
ABCG8
ADCY2
ADCY3
ADCY4
ADCY5
ADCY6
ADCY7
ADCY8
ADCY9
AQP1
AQP4
AQP8
AQP9
ATP1A1
ATP1A2
ATP1A3
ATP1A4
ATP1B2
ATP1B3
ATP1B4
BAAT
CA2
CFTR
CYP3A4
CYP7A1
EPHX1
GNAS
HMGCR
KCNN2
LDLR
NCEH1
NR0B2
NR1H4
PRKACA
PRKACB
PRKACG
SCT
SCTR
SLC10A1
SLC10A2
SLC22A1
SLC22A7
SLC22A8
SLC27A5
SLC2A1
SLC4A2
SLC4A4
SLC4A5
SLC51A
SLC51B
SLC5A1
SLC9A1
SLCO1A2
SLCO1B1
SULT2A1
UGT1A1
UGT1A10
UGT1A3
UGT1A4
UGT1A5
UGT1A6
UGT1A7
UGT1A8
UGT1A9
UGT2A1
UGT2A2
UGT2A3
UGT2B10
UGT2B11
UGT2B15
UGT2B17
UGT2B28
UGT2B4
UGT2B7

## Sheet: Pathways in cancer
Pathways in cancer	Small cell lung cancer	Total
ADCY1	BIRC7	ADCY1
ALK	CDKN2B	ALK
BCL2L11	COL4A1	BCL2L11
BDKRB2	COL4A2	BDKRB2
BIRC7	COL4A6	BIRC7
CDKN2B	FHIT	CDKN2B
CEBPA	LAMA5	CEBPA
COL4A1	PTGS2	COL4A1
COL4A2	RXRA	COL4A2
COL4A6	TRAF4	COL4A6
CXCR4	AKT1	CXCR4
ESR1	AKT2	ESR1
FRAT2	AKT3	FHIT
GNA12	APAF1	FRAT2
GNA13	BAK1	GNA12
GNAQ	BAX	GNA13
GNG2	BCL2	GNAQ
GNG4	BCL2L1	GNG2
GNG7	BIRC2	GNG4
HEY1	BIRC3	GNG7
IFNGR1	CASP3	HEY1
IL13	CASP9	IFNGR1
IL23A	CCND1	IL13
JAG2	CCNE1	IL23A
LAMA5	CCNE2	JAG2
MAP2K1	CDK2	LAMA5
PDGFB	CDK4	MAP2K1
PGF	CDK6	PDGFB
PTGER3	CDKN1A	PGF
PTGS2	CDKN1B	PTGER3
RARA	CHUK	PTGS2
RASGRP4	CKS1B	RARA
RXRA	CKS2	RASGRP4
SUFU	COL4A3	RXRA
TGFB2	COL4A4	SUFU
TRAF4	COL4A5	TGFB2
VEGFA	CYCS	TRAF4
ABL1	DDB2	VEGFA
ADCY2	E2F1	AKT1
ADCY3	E2F2	ABL1
ADCY4	E2F3	ADCY2
ADCY5	FN1	ADCY3
ADCY6	GADD45A	ADCY4
ADCY7	GADD45B	ADCY5
ADCY8	GADD45G	ADCY6
ADCY9	IKBKB	ADCY7
AGT	IKBKG	ADCY8
AGTR1	ITGA2	ADCY9
AKT1	ITGA2B	AGT
AKT2	ITGA3	AGTR1
AKT3	ITGA6	AKT2
APAF1	ITGAV	AKT3
APC	ITGB1	APAF1
APC2	LAMA1	APC
APPL1	LAMA2	APC2
AR	LAMA3	APPL1
ARAF	LAMA4	AR
ARHGEF1	LAMB1	ARAF
ARHGEF11	LAMB2	ARHGEF1
ARHGEF12	LAMB3	ARHGEF11
ARNT	LAMB4	ARHGEF12
ARNT2	LAMC1	ARNT
AXIN1	LAMC2	ARNT2
AXIN2	LAMC3	AXIN1
BAD	MAX	AXIN2
BAK1	MYC	BAD
BAX	NFKB1	BAK1
BBC3	NFKBIA	BAX
BCL2	NOS2	BBC3
BCL2L1	PIK3CA	BCL2
BCR	PIK3CB	BCL2L1
BDKRB1	PIK3CD	BCR
BID	PIK3R1	BDKRB1
BIRC2	PIK3R2	BID
BIRC3	PIK3R3	BIRC2
BIRC5	POLK	BIRC3
BMP2	PTEN	BIRC5
BMP4	PTK2	BMP2
BRAF	RARB	BMP4
BRCA2	RB1	BRAF
CALM1	RELA	BRCA2
CALM2	RXRB	CALM1
CALM3	RXRG	CALM2
CALML3	SKP2	CALM3
CALML4	TP53	CALML3
CALML5	TRAF1	CALML4
CALML6	TRAF2	CALML5
CAMK2A	TRAF3	CALML6
CAMK2B	TRAF5	CAMK2A
CAMK2D	TRAF6	CAMK2B
CAMK2G	XIAP	CAMK2D
CASP3	ZBTB17	CAMK2G
CASP7		CASP3
CASP8		CASP7
CASP9		CASP8
CBL		CASP9
CCDC6		CBL
CCNA1		CCDC6
CCNA2		CCNA1
CCND1		CCNA2
CCND2		CCND1
CCND3		CCND2
CCNE1		CCND3
CCNE2		CCNE1
CDC42		CCNE2
CDH1		CDC42
CDK2		CDH1
CDK4		CDK2
CDK6		CDK4
CDKN1A		CDK6
CDKN1B		CDKN1A
CDKN2A		CDKN1B
CHUK		CDKN2A
CKS1B		CHUK
CKS2		CKS1B
COL4A3		CKS2
COL4A4		COL4A3
COL4A5		COL4A4
CREBBP		COL4A5
CRK		CREBBP
CRKL		CRK
CSF1R		CRKL
CSF2RA		CSF1R
CSF2RB		CSF2RA
CSF3R		CSF2RB
CTBP1		CSF3R
CTBP2		CTBP1
CTNNA1		CTBP2
CTNNA2		CTNNA1
CTNNA3		CTNNA2
CTNNB1		CTNNA3
CUL1		CTNNB1
CUL2		CUL1
CXCL12		CUL2
CXCL8		CXCL12
CYCS		CXCL8
DAPK1		CYCS
DAPK2		DAPK1
DAPK3		DAPK2
DCC		DAPK3
DDB2		DCC
DLL1		DDB2
DLL3		DLL1
DLL4		DLL3
DVL1		DLL4
DVL2		DVL1
DVL3		DVL2
E2F1		DVL3
E2F2		E2F1
E2F3		E2F2
EDN1		E2F3
EDNRA		EDN1
EDNRB		EDNRA
EGF		EDNRB
EGFR		EGF
EGLN1		EGFR
EGLN2		EGLN1
EGLN3		EGLN2
ELK1		EGLN3
ELOB		ELK1
ELOC		ELOB
EML4		ELOC
EP300		EML4
EPAS1		EP300
EPO		EPAS1
EPOR		EPO
ERBB2		EPOR
ESR2		ERBB2
ETS1		ESR2
F2		ETS1
F2R		F2
F2RL3		F2R
FADD		F2RL3
FAS		FADD
FASLG		FAS
FGF1		FASLG
FGF10		FGF1
FGF16		FGF10
FGF17		FGF16
FGF18		FGF17
FGF19		FGF18
FGF2		FGF19
FGF20		FGF2
FGF21		FGF20
FGF22		FGF21
FGF23		FGF22
FGF3		FGF23
FGF4		FGF3
FGF5		FGF4
FGF6		FGF5
FGF7		FGF6
FGF8		FGF7
FGF9		FGF8
FGFR1		FGF9
FGFR2		FGFR1
FGFR3		FGFR2
FGFR4		FGFR3
FH		FGFR4
FLT3		FH
FLT3LG		FLT3
FLT4		FLT3LG
FN1		FLT4
FOS		FN1
FOXO1		FOS
FRAT1		FOXO1
FZD1		FRAT1
FZD10		FZD1
FZD2		FZD10
FZD3		FZD2
FZD4		FZD3
FZD5		FZD4
FZD6		FZD5
FZD7		FZD6
FZD8		FZD7
FZD9		FZD8
GADD45A		FZD9
GADD45B		GADD45A
GADD45G		GADD45B
GLI1		GADD45G
GLI2		GLI1
GLI3		GLI2
GNA11		GLI3
GNAI1		GNA11
GNAI2		GNAI1
GNAI3		GNAI2
GNAS		GNAI3
GNB1		GNAS
GNB2		GNB1
GNB3		GNB2
GNB4		GNB3
GNB5		GNB4
GNG10		GNB5
GNG11		GNG10
GNG12		GNG11
GNG13		GNG12
GNG3		GNG13
GNG5		GNG3
GNG8		GNG5
GNGT1		GNG8
GNGT2		GNGT1
GRB2		GNGT2
GSK3B		GRB2
GSTA1		GSK3B
GSTA2		GSTA1
GSTA3		GSTA2
GSTA4		GSTA3
GSTA5		GSTA4
GSTM1		GSTA5
GSTM2		GSTM1
GSTM3		GSTM2
GSTM4		GSTM3
GSTM5		GSTM4
GSTO1		GSTM5
GSTO2		GSTO1
GSTP1		GSTO2
GSTT1		GSTP1
GSTT2		GSTT1
GSTT2B		GSTT2
HDAC1		GSTT2B
HDAC2		HDAC1
HES1		HDAC2
HES5		HES1
HEY2		HES5
HEYL		HEY2
HGF		HEYL
HHIP		HGF
HIF1A		HHIP
HMOX1		HIF1A
HRAS		HMOX1
HSP90AA1		HRAS
HSP90AB1		HSP90AA1
HSP90B1		HSP90AB1
IFNA1		HSP90B1
IFNA10		IFNA1
IFNA13		IFNA10
IFNA14		IFNA13
IFNA16		IFNA14
IFNA17		IFNA16
IFNA2		IFNA17
IFNA21		IFNA2
IFNA4		IFNA21
IFNA5		IFNA4
IFNA6		IFNA5
IFNA7		IFNA6
IFNA8		IFNA7
IFNAR1		IFNA8
IFNAR2		IFNAR1
IFNG		IFNAR2
IFNGR2		IFNG
IGF1		IFNGR2
IGF1R		IGF1
IGF2		IGF1R
IKBKB		IGF2
IKBKG		IKBKB
IL12A		IKBKG
IL12B		IL12A
IL12RB1		IL12B
IL12RB2		IL12RB1
IL13RA1		IL12RB2
IL15		IL13RA1
IL15RA		IL15
IL2		IL15RA
IL23R		IL2
IL2RA		IL23R
IL2RB		IL2RA
IL2RG		IL2RB
IL3		IL2RG
IL3RA		IL3
IL4		IL3RA
IL4R		IL4
IL5		IL4R
IL5RA		IL5
IL6		IL5RA
IL6R		IL6
IL6ST		IL6R
IL7		IL6ST
IL7R		IL7
ITGA2		IL7R
ITGA2B		ITGA2
ITGA3		ITGA2B
ITGA6		ITGA3
ITGAV		ITGA6
ITGB1		ITGAV
JAG1		ITGB1
JAK1		JAG1
JAK2		JAK1
JAK3		JAK2
JUN		JAK3
JUP		JUN
KEAP1		JUP
KIF7		KEAP1
KIT		KIF7
KITLG		KIT
KLK3		KITLG
KNG1		KLK3
KRAS		KNG1
LAMA1		KRAS
LAMA2		LAMA1
LAMA3		LAMA2
LAMA4		LAMA3
LAMB1		LAMA4
LAMB2		LAMB1
LAMB3		LAMB2
LAMB4		LAMB3
LAMC1		LAMB4
LAMC2		LAMC1
LAMC3		LAMC2
LEF1		LAMC3
LPAR1		LEF1
LPAR2		LPAR1
LPAR3		LPAR2
LPAR4		LPAR3
LPAR5		LPAR4
LPAR6		LPAR5
LRP5		LPAR6
LRP6		LRP5
MAP2K2		LRP6
MAPK1		MAP2K2
MAPK10		MAPK1
MAPK3		MAPK10
MAPK8		MAPK3
MAPK9		MAPK8
MAX		MAPK9
MDM2		MAX
MECOM		MDM2
MET		MECOM
MGST1		MET
MGST2		MGST1
MGST3		MGST2
MITF		MGST3
MLH1		MITF
MMP1		MLH1
MMP2		MMP1
MMP9		MMP2
MSH2		MMP9
MSH3		MSH2
MSH6		MSH3
MTOR		MSH6
MYC		MTOR
NCOA1		MYC
NCOA3		NCOA1
NCOA4		NCOA3
NFE2L2		NCOA4
NFKB1		NFE2L2
NFKB2		NFKB1
NFKBIA		NFKB2
NKX3-1		NFKBIA
NOS2		NKX3-1
NOTCH1		NOS2
NOTCH2		NOTCH1
NOTCH3		NOTCH2
NOTCH4		NOTCH3
NQO1		NOTCH4
NRAS		NQO1
NTRK1		NRAS
PAX8		NTRK1
PDGFA		PAX8
PDGFRA		PDGFA
PDGFRB		PDGFRA
PIK3CA		PDGFRB
PIK3CB		PIK3CA
PIK3CD		PIK3CB
PIK3R1		PIK3CD
PIK3R2		PIK3R1
PIK3R3		PIK3R2
PIM1		PIK3R3
PIM2		PIM1
PLCB1		PIM2
PLCB2		PLCB1
PLCB3		PLCB2
PLCB4		PLCB3
PLCG1		PLCB4
PLCG2		PLCG1
PLD1		PLCG2
PLD2		PLD1
PLEKHG5		PLD2
PMAIP1		PLEKHG5
PML		PMAIP1
POLK		PML
PPARD		POLK
PPARG		PPARD
PRKACA		PPARG
PRKACB		PRKACA
PRKACG		PRKACB
PRKCA		PRKACG
PRKCB		PRKCA
PRKCG		PRKCB
PTCH1		PRKCG
PTCH2		PTCH1
PTEN		PTCH2
PTGER1		PTEN
PTGER2		PTGER1
PTGER4		PTGER2
PTK2		PTGER4
RAC1		PTK2
RAC2		RAC1
RAC3		RAC2
RAD51		RAC3
RAF1		RAD51
RALA		RAF1
RALB		RALA
RALBP1		RALB
RALGDS		RALBP1
RARB		RALGDS
RASGRP1		RARB
RASGRP2		RASGRP1
RASGRP3		RASGRP2
RASSF1		RASGRP3
RASSF5		RASSF1
RB1		RASSF5
RBX1		RB1
RELA		RBX1
RET		RELA
RHOA		RET
ROCK1		RHOA
ROCK2		ROCK1
RPS6KA5		ROCK2
RPS6KB1		RPS6KA5
RPS6KB2		RPS6KB1
RUNX1		RPS6KB2
RUNX1T1		RUNX1
RXRB		RUNX1T1
RXRG		RXRB
SHH		RXRG
SKP1		SHH
SKP2		SKP1
SLC2A1		SKP2
SMAD2		SLC2A1
SMAD3		SMAD2
SMAD4		SMAD3
SMO		SMAD4
SOS1		SMO
SOS2		SOS1
SP1		SOS2
SPI1		SP1
STAT1		SPI1
STAT2		STAT1
STAT3		STAT2
STAT4		STAT3
STAT5A		STAT4
STAT5B		STAT5A
STAT6		STAT5B
STK4		STAT6
TCF7		STK4
TCF7L1		TCF7
TCF7L2		TCF7L1
TERC		TCF7L2
TERT		TERC
TFG		TERT
TGFA		TFG
TGFB1		TGFA
TGFB3		TGFB1
TGFBR1		TGFB3
TGFBR2		TGFBR1
TP53		TGFBR2
TPM3		TP53
TPR		TPM3
TRAF1		TPR
TRAF2		TRAF1
TRAF3		TRAF2
TRAF5		TRAF3
TRAF6		TRAF5
TXNRD1		TRAF6
TXNRD2		TXNRD1
TXNRD3		TXNRD2
VEGFB		TXNRD3
VEGFC		VEGFB
VEGFD		VEGFC
VHL		VEGFD
WNT1		VHL
WNT10A		WNT1
WNT10B		WNT10A
WNT11		WNT10B
WNT16		WNT11
WNT2		WNT16
WNT2B		WNT2
WNT3		WNT2B
WNT3A		WNT3
WNT4		WNT3A
WNT5A		WNT4
WNT5B		WNT5A
WNT6		WNT5B
WNT7A		WNT6
WNT7B		WNT7A
WNT8A		WNT7B
WNT8B		WNT8A
WNT9A		WNT8B
WNT9B		WNT9A
XIAP		WNT9B
ZBTB16		XIAP
ZBTB17		ZBTB16
		ZBTB17

## Sheet: Parasitic infection
Amoebiasis
ADCY1
COL4A1
COL4A2
COL4A6
GNAQ
IL1R2
ITGB2
LAMA5
TGFB2
ACTN1
ACTN4
ARG1
ARG2
C8A
C8B
C8G
C9
CASP3
CD14
CD1A
CD1B
CD1C
CD1D
CD1E
COL1A1
COL1A2
COL3A1
COL4A3
COL4A4
COL4A5
CSF2
CTSG
CXCL1
CXCL2
CXCL3
CXCL8
FN1
GNA11
GNA14
GNA15
GNAL
GNAS
HSPB1
IFNG
IL10
IL12A
IL12B
IL1B
IL1R1
IL6
ITGAM
LAMA1
LAMA2
LAMA3
LAMA4
LAMB1
LAMB2
LAMB3
LAMB4
LAMC1
LAMC2
LAMC3
LOC102723407
MUC2
NFKB1
NOS2
PIK3CA
PIK3CB
PIK3CD
PIK3R1
PIK3R2
PIK3R3
PLCB1
PLCB2
PLCB3
PLCB4
PRDX1
PRKACA
PRKACB
PRKACG
PRKCA
PRKCB
PRKCG
PTK2
RAB5A
RAB5B
RAB5C
RAB7A
RAB7B
RELA
SERPINB10
SERPINB13
SERPINB3
SERPINB4
SERPINB6
SERPINB9
TGFB1
TGFB3
TLR2
TLR4
TNF
VCL

## Sheet: Extracellular matrix interactio
Focal adhesion	ECM-receptor interaction	Total
BCAR1	COL4A1	BCAR1
CAV1	COL4A2	CAV1
COL4A1	COL4A6	COL4A1
COL4A2	COL6A1	COL4A2
COL4A6	ITGA7	COL4A6
COL6A1	LAMA5	COL6A1
FYN	SPP1	FYN
ITGA7	SV2B	ITGA7
LAMA5	AGRN	LAMA5
MAP2K1	CD36	MAP2K1
PDGFB	CD44	PDGFB
PDGFC	CD47	PDGFC
PGF	CHAD	PGF
SPP1	COL1A1	SPP1
VEGFA	COL1A2	SV2B
ACTB	COL2A1	VEGFA
ACTG1	COL4A3	AGRN
ACTN1	COL4A4	ACTB
ACTN4	COL4A5	ACTG1
AKT1	COL6A2	ACTN1
AKT2	COL6A3	ACTN4
AKT3	COL6A5	AKT1
ARHGAP35	COL6A6	AKT2
ARHGAP5	COL9A1	AKT3
BAD	COL9A2	ARHGAP35
BCL2	COL9A3	ARHGAP5
BIRC2	COMP	BAD
BIRC3	DAG1	BCL2
BRAF	DMP1	BIRC2
BUB1B-PAK6	DSPP	BIRC3
CAPN2	FN1	BRAF
CAV2	FRAS1	BUB1B-PAK6
CAV3	FREM1	CAPN2
CCND1	FREM2	CAV2
CCND2	GP1BA	CAV3
CCND3	GP1BB	CCND1
CDC42	GP5	CCND2
CHAD	GP6	CCND3
COL1A1	GP9	CD36
COL1A2	HMMR	CD44
COL2A1	HSPG2	CD47
COL4A3	IBSP	CDC42
COL4A4	ITGA1	CHAD
COL4A5	ITGA10	COL1A1
COL6A2	ITGA11	COL1A2
COL6A3	ITGA2	COL2A1
COL6A5	ITGA2B	COL4A3
COL6A6	ITGA3	COL4A4
COL9A1	ITGA4	COL4A5
COL9A2	ITGA5	COL6A2
COL9A3	ITGA6	COL6A3
COMP	ITGA8	COL6A5
CRK	ITGA9	COL6A6
CRKL	ITGAV	COL9A1
CTNNB1	ITGB1	COL9A2
DIAPH1	ITGB3	COL9A3
DOCK1	ITGB4	COMP
EGF	ITGB5	CRK
EGFR	ITGB6	CRKL
ELK1	ITGB7	CTNNB1
ERBB2	ITGB8	DAG1
FLNA	LAMA1	DIAPH1
FLNB	LAMA2	DMP1
FLNC	LAMA3	DOCK1
FLT1	LAMA4	DSPP
FLT4	LAMB1	EGF
FN1	LAMB2	EGFR
GRB2	LAMB3	ELK1
GSK3B	LAMB4	ERBB2
HGF	LAMC1	FLNA
HRAS	LAMC2	FLNB
IBSP	LAMC3	FLNC
IGF1	NPNT	FLT1
IGF1R	RELN	FLT4
ILK	SDC1	FN1
ITGA1	SDC4	FRAS1
ITGA10	SV2A	FREM1
ITGA11	SV2C	FREM2
ITGA2	THBS1	GP1BA
ITGA2B	THBS2	GP1BB
ITGA3	THBS3	GP5
ITGA4	THBS4	GP6
ITGA5	TNC	GP9
ITGA6	TNN	GRB2
ITGA8	TNR	GSK3B
ITGA9	TNXB	HGF
ITGAV	VTN	HMMR
ITGB1	VWF	HRAS
ITGB3		HSPG2
ITGB4		IBSP
ITGB5		IGF1
ITGB6		IGF1R
ITGB7		ILK
ITGB8		ITGA1
JUN		ITGA10
KDR		ITGA11
LAMA1		ITGA2
LAMA2		ITGA2B
LAMA3		ITGA3
LAMA4		ITGA4
LAMB1		ITGA5
LAMB2		ITGA6
LAMB3		ITGA8
LAMB4		ITGA9
LAMC1		ITGAV
LAMC2		ITGB1
LAMC3		ITGB3
MAPK1		ITGB4
MAPK10		ITGB5
MAPK3		ITGB6
MAPK8		ITGB7
MAPK9		ITGB8
MET		JUN
MYL10		KDR
MYL11		LAMA1
MYL12A		LAMA2
MYL12B		LAMA3
MYL2		LAMA4
MYL5		LAMB1
MYL7		LAMB2
MYL9		LAMB3
MYLK		LAMB4
MYLK2		LAMC1
MYLK3		LAMC2
MYLK4		LAMC3
PAK1		MAPK1
PAK2		MAPK10
PAK3		MAPK3
PAK4		MAPK8
PAK5		MAPK9
PAK6		MET
PARVA		MYL10
PARVB		MYL11
PARVG		MYL12A
PDGFA		MYL12B
PDGFD		MYL2
PDGFRA		MYL5
PDGFRB		MYL7
PDPK1		MYL9
PIK3CA		MYLK
PIK3CB		MYLK2
PIK3CD		MYLK3
PIK3R1		MYLK4
PIK3R2		NPNT
PIK3R3		PAK1
PIP5K1A		PAK2
PIP5K1B		PAK3
PIP5K1C		PAK4
PPP1CA		PAK5
PPP1CB		PAK6
PPP1CC		PARVA
PPP1R12A		PARVB
PPP1R12B		PARVG
PPP1R12C		PDGFA
PRKCA		PDGFD
PRKCB		PDGFRA
PRKCG		PDGFRB
PTEN		PDPK1
PTK2		PIK3CA
PXN		PIK3CB
RAC1		PIK3CD
RAC2		PIK3R1
RAC3		PIK3R2
RAF1		PIK3R3
RAP1A		PIP5K1A
RAP1B		PIP5K1B
RAPGEF1		PIP5K1C
RASGRF1		PPP1CA
RELN		PPP1CB
RHOA		PPP1CC
ROCK1		PPP1R12A
ROCK2		PPP1R12B
SHC1		PPP1R12C
SHC2		PRKCA
SHC3		PRKCB
SHC4		PRKCG
SOS1		PTEN
SOS2		PTK2
SRC		PXN
THBS1		RAC1
THBS2		RAC2
THBS3		RAC3
THBS4		RAF1
TLN1		RAP1A
TLN2		RAP1B
TNC		RAPGEF1
TNN		RASGRF1
TNR		RELN
TNXB		RHOA
VASP		ROCK1
VAV1		ROCK2
VAV2		SDC1
VAV3		SDC4
VCL		SHC1
VEGFB		SHC2
VEGFC		SHC3
VEGFD		SHC4
VTN		SOS1
VWF		SOS2
XIAP		SRC
ZYX		SV2A
		SV2C
		THBS1
		THBS2
		THBS3
		THBS4
		TLN1
		TLN2
		TNC
		TNN
		TNR
		TNXB
		VASP
		VAV1
		VAV2
		VAV3
		VCL
		VEGFB
		VEGFC
		VEGFD
		VTN
		VWF
		XIAP
		ZYX

## Sheet: Nucleotide metabolism
Nucleotide metabolism
ADSS1
AMPD2
CDA
NT5DC4
RRM2B
TK1
UPP1
ADA
ADA2
ADK
ADSL
ADSS2
AK1
AK2
AK3
AK4
AK5
AK6
AK7
AK8
AK9
AMPD1
AMPD3
APRT
ASMTL
CANT1
CMPK1
CMPK2
CTPS1
CTPS2
DCK
DCTD
DCTPP1
DGUOK
DTYMK
DUT
ENPP1
ENPP3
ENTPD1
ENTPD2
ENTPD3
ENTPD4
ENTPD5
ENTPD6
ENTPD8
GDA
GMPR
GMPR2
GMPS
GUK1
HDDC2
HPRT1
IMPDH1
IMPDH2
ITPA
LACC1
NME1
NME1-NME2
NME2
NME3
NME4
NME6
NME7
NT5C
NT5C1A
NT5C1B
NT5C1B-RDH14
NT5C2
NT5C3A
NT5C3B
NT5E
NT5M
NTPCR
NUDT16
PNP
RRM1
RRM2
TK2
TYMP
TYMS
UCK1
UCK2
UCKL1
UPP2
XDH

[truncated: 4 more sheets: Nervous system, Viral regulation of cytokines n, Signal transduction, Viral infection]
