# Supplementary material for: Peculiar transcriptional reprogramming with functional impairment of dendritic cells upon exposure to transformed HTLV-1-infected cells
Source: bioRxiv preprint, doi:10.1101/2024.05.21.592359, version 3 (2024-07-09)
Supplement: Supplemental Table 8 [file 592359_file16.xlsx]

## Sheet: Sup Figure 2a
Sup Figure 2a
CD86 as % of CD11c+ MDDC (24h)												Normalized CD86 MFI (24h)
	MDDC exposed to	Jurkat	CEM	Molt-4	C91-PL	MT-2	Hut102	LPS		n=17 (Jurkat;C91-PL;LPS)			MDDC exposed to	Jurkat	CEM	Molt-4	C91-PL	MT-2	Hut102	LPS		n=17 (Jurkat;C91-PL;LPS)
	12	11.8			27.9	16.1	18.6	99.3		n=9 (CEM)			12	1			1.8	1.05	1.38	8.77		n=10 (CEM)
	13	12.6			21.6	14.3	18.4	96.9		n=6 (Molt-4)			13	1			2.09	1.46	1.6	38.35		n=7 (Molt-4)
	14	12.5	12.7	20	30.9	19.7	21.6	99.2		n=8 (MT-2;Hut102)			14	1	0.96	1.19	2.51	1.58	1.62	42.54		n=8 (MT-2;Hut102)
	15	8.9	15.2	10.2	30.1	18	31.5	99.7					15	1	1.11	1.01	1.75	1.25	1.87	54.47
	16	39.2			38.4	32.9	38.4	99.5					16	1	0.68	0.69	1.07	0.89	1.12	24.52
	17	17.5	24.1		34.2			96.8					17	1	1.27		1.98			16.66
	18	7.38	12		18.9			97.4					18	1	1.02		1.67			38.3
	19	19.9	17.6		23.5			96.5					19	1	0.89		1.38			27.43
	20	12.1	10.6	12.8	24.1			94.2					20	1	0.87	0.89	1.63			13.98
	21	18.3	12.7	17.7	27.6			95.4					21	1	0.89	0.98	1.65			24.39
	22	18.4	8.11	13.1	29			95.6					22	1	0.79	0.85	1.45			17.37
	23	17	12.2	11.9	26.8			97.6					23	1	0.9	0.9	1.87			20.81
	24	6.9			25.5	7.12	10.2	96.2					24	1			2.45	1.19	1.03	43.36
	25	12.3			21.2	18.9	18.7	96.7					25	1			1.52	1.34	1.27	29.5
	26	18.8			34.7	21.8	27.7	92					26	1			2.67	1.32	1.36	25.82
	33	24.2			26.5			98.5					33	1			1.09			44.63
	34	11			13.2			98.2					34	1			1.28			69.43
	Statistical analysis
	Did not pass Shapiro-Wilk normality test												Statistical analysis
	Kruskal-Wallis test with Dunn's multiple comparisons test												Passed Shapiro-Wilk normality test
	Kruskal-Wallis test												Ordinary one-way ANOVA with Dunnett's mutliple comparisons test
	Kruskal-Wallis statistics	57.14											ANOVA summary
	P value	<0.0001											DFn, DFd	6, 77
													F	40.49
	Dunn's multiple comparisons test	Mean rank diff.	Significant?	Summary	Adjusted P Value								P value	<0.0001
	Jurkat vs. CEM	3.876	No	ns	>0.9999
	Jurkat vs. Molt-4	1.848	No	ns	>0.9999								Dunnett's multiple comparisons test	Mean Diff.	95.00% CI of diff.	Significant?	Summary	Adjusted P Value
	Jurkat vs. C91-PL	-27.15	Yes	**	0.0053								Jurkat vs. CEM	0.062	-7.577 to 7.701	No	ns	>0.9999
	Jurkat vs. MT-2	-9.423	No	ns	>0.9999								Jurkat vs. Molt-4	0.07	-8.538 to 8.678	No	ns	>0.9999
	Jurkat vs. Hut102	-17.74	No	ns	0.4943								Jurkat vs. C91-PL	-0.7565	-7.331 to 5.818	No	ns	0.9996
	Jurkat vs. LPS	-50.74	Yes	****	<0.0001								Jurkat vs. MT-2	-0.26	-8.478 to 7.958	No	ns	0.9999
													Jurkat vs. Hut102	-0.4063	-8.624 to 7.812	No	ns	0.9998
													Jurkat vs. LPS	-30.78	-37.36 to -24.21	Yes	****	<0.0001
CD86 as % of CD11c+ MDDC (48h)
	MDDC exposed to	Jurkat	CEM	Molt-4	C91-PL	MT-2	Hut102	LPS		n=31 (Jurkat;C91-PL;LPS)		Normalized CD86 MFI (48h)
	1	28.3			38.5	38.4		98.6		n=10 (CEM)			MDDC exposed to	Jurkat	CEM	Molt-4	C91-PL	MT-2	Hut102	LPS		n=31 (Jurkat;C91-PL;LPS)
	2	7.55			15.2	35.1	11.8	93		n=7 (Molt-4)			1	1			2.57	3.21		24.31		n=10 (CEM)
	3	7.35			13.8	21.2	17	89.8		n=12 (MT-2)			2	1			1.67	3.67	1.38	22.61		n=7 (Molt-4)
	4	12.6			11	33.1	18.1	97.8		n=11 (Hut102)			3	1			1.7	2.89	2.58	17.82		n=12 (MT-2)
	5	13.3			10.9	28.1	23.6	99.1					4	1			1.51	3.47	1.9	23.59		n=11 (Hut102)
	7	21.3			21.6	27	25.3	97.5					5	1			1.05	1.98	1.35	21.89
	8	15.3			15.2	17.3	22.3	85.3					7	1			1.3	1.33	1.3	11.83
	9	18			25.2	48	19.8	88.3					8	1			0.84	0.98	1.07	12.03
	10	33.5			13.7	28.1	19.9	99					9	1			1.7	3.87	1.3	10.43
	11	9.9			15.9	24.3	21.9	99.7					10	1			0.48	0.75	0.47	23.64
	12	6.19	5.48	5.08	10.7	13.6	13.5	94.9					11	1			0.92	1.32	1.34	16.18
	14	5.9	11.4	5.62	10.9			98.2					12	1	1	1	1.22	1.64	1.27	24.32
	15	17.9	16.6	17.7	21.7			92.6					14	1	0.98	0.97	0.95			17.63
	16	20.3	15.9		26.8			95.1					15	1	1.09	0.98	1.11			16.19
	17	7.02	5.95		16.8			96.7					16	1	0.94		1.28			9.38
	18	22.9	20.5		26.1			95.4					17	1	0.99		1.48			19.27
	19	17.2	13	21	24			93.8					18	1	0.93		1.07			9.25
	20	21	23	19.7	23.3			92.8					19	1	0.88	1	1.23			7.04
	21	7.75	7.61	12	18.6			93.9					20	1	1.14	1.06	1.12			10.62
	22	16.2	16.8	20.1	23			94.8					21	1	0.95	0.96	1.23			12.78
	23	5.8			11.9	8.4	9.93	97					22	1	1.07	1.13	1.19			12.91
	24	21.8			23.9			96.7					23	1			1.52	1.52	1.16	20.16
	25	29			26			92					24	1			1.24			24.2
	26	7.83			11.6			96.5					25	1			1.1			13.38
	27	7.29			9			97.5					26	1			1.43			41.11
	28	38.9			32.8			96.6					27	1			1			19.17
	29	12.4			18.6			95.9					28	1			0.97			12.14
	30	13.3			26.1			97.1					29	1			1.44			27.62
	31	11.6			9.94			97.9					30	1			2.08			20.2
	33	30.6			27			98.5					31	1			1.13			39.59
	34	9.44			15.3			98.2					33	1			1.31			48.41
													34	1			2.63			71.91
	Statistical analysis
	Did not pass Shapiro-Wilk normality test
	Kruskal-Wallis test with Dunn's multiple comparisons test												Statistical analysis
	Kruskal-Wallis test												Did not pass Shapiro-Wilk normality test
	Kruskal-Wallis statistics	80.25											Kruskal-Wallis test with Dunn's multiple comparisons test
	P value	<0.0001											Kruskal-Wallis test
													Kruskal-Wallis statistics	95.07
	Dunn's multiple comparisons test	Mean rank diff.	Significant?	Summary	Adjusted P Value								P value	<0.0001
	Jurkat vs. CEM	7.524	No	ns	>0.9999
	Jurkat vs. Molt-4	4.203	No	ns	>0.9999								Dunn's multiple comparisons test	Mean rank diff.	Significant?	Summary	Adjusted P Value
	Jurkat vs. C91-PL	-13.11	No	ns	>0.9999								Jurkat vs. CEM	7.55	No	ns	>0.9999
	Jurkat vs. MT-2	-33.1	No	ns	0.0691								Jurkat vs. Molt-4	2.857	No	ns	>0.9999
	Jurkat vs. Hut102	-12.73	No	ns	>0.9999								Jurkat vs. C91-PL	-28.19	Yes	*	0.0219
	Jurkat vs. LPS	-74.73	Yes	****	<0.0001								Jurkat vs. MT-2	-43.38	Yes	**	0.005
													Jurkat vs. Hut102	-34.91	No	ns	0.0551
													Jurkat vs. LPS	-83	Yes	****	<0.0001

## Sheet: Sup Figure 2b
Sup Figure 2b
CD83 as % of CD11c+ MDDC (24h)												Normalized CD83 MFI (24h)
	MDDC exposed to	Jurkat	CEM	Molt-4	C91-PL	MT-2	Hut102	LPS		n=6 (Jurkat;C91-PL;LPS)			MDDC exposed to	Jurkat	CEM	Molt-4	C91-PL	MT-2	Hut102	LPS		n=6 (Jurkat;C91-PL;LPS)
	13	7.52			11	15.6	15.6	96		n=3 (CEM;Molt-4)			13	1			1.14	1.18	1.05	17.05		n=3 (CEM;Molt-4)
	14	5.1	5.85	8.96	9.6	10.6	9.5	96		n=4 (MT-2;Hut102)			14	1	0.93	1.02	1.19	1.15	1.09	15.55		n=4 (MT-2;Hut102)
	15	3.35	6.85	4.35	12.9	9.34	15.5	98.7					15	1	1.09	1.04	1.29	1.18	1.26	21.26
	16	18.4	13.3	11.2	17.7	20.5	20.4	98.6					16	1	1.28	1.3	1.62	1.64	1.51	26.54
	33	15.4			17.2			93.2					33	1			1.03			8.55
	34	7.74			7.8			81.5					34	1			0.96			7.12
	Statistical analysis
	Did not pass Shapiro-Wilk normality test												Statistical analysis
	Kruskal-Wallis test with Dunn's multiple comparisons test												Did not pass Shapiro-Wilk normality test
	Kruskal-Wallis test												Kruskal-Wallis test with Dunn's multiple comparisons test
	Kruskal-Wallis statistics	19.07											Kruskal-Wallis test
	P value	0.0041											Kruskal-Wallis statistics	21.27
													P value	0.0016
	Dunn's multiple comparisons test	Mean rank diff.	Significant?	Summary	Adjusted P Value
	Jurkat vs. CEM	1.167	No	ns	>0.9999								Dunn's multiple comparisons test	Mean rank diff.	Significant?	Summary	Adjusted P Value
	Jurkat vs. Molt-4	1.167	No	ns	>0.9999								Jurkat vs. CEM	-6.333	No	ns	>0.9999
	Jurkat vs. C91-PL	-6	No	ns	>0.9999								Jurkat vs. Molt-4	-8.833	No	ns	>0.9999
	Jurkat vs. MT-2	-7.542	No	ns	>0.9999								Jurkat vs. C91-PL	-10	No	ns	0.3836
	Jurkat vs. Hut102	-9.042	No	ns	0.8119								Jurkat vs. MT-2	-13.75	No	ns	0.1362
	Jurkat vs. LPS	-19.67	Yes	**	0.0017								Jurkat vs. Hut102	-11.88	No	ns	0.2946
													Jurkat vs. LPS	-24	Yes	****	<0.0001
CD83 as % of CD11c+ MDDC (48h)												Normalized CD83 MFI (48h)
	MDDC exposed to	Jurkat	CEM	Molt-4	C91-PL	MT-2	Hut102	LPS		n=12 (Jurkat;C91-PL;LPS)			MDDC exposed to	Jurkat	CEM	Molt-4	C91-PL	MT-2	Hut102	LPS		n=12 (Jurkat;C91-PL;LPS)
	4	16.1			10.5	44.2	26.5	98.3		n=3 (CEM;Molt-4)			4	1			0.98	1.8	1.19	17.56		n=3 (CEM;Molt-4)
	5	3.11			3.63	45.2	14.6	94.9		n=8 (MT-2;Hut102)			5	1			1.01	3.89	1.36	30.68		n=8 (MT-2;Hut102)
	7	6.52			8.58	27.1	14.6	90.9					7	1			1.23	1.75	1.35	23.12
	8	9.85			9.33	21.1	21.7	94.8					8	1			1.15	1.39	1.28	12.91
	10	15			12	37.9	13.1	70.6					10	1			1	1.42	0.82	3.17
	11	21.6			8.91	23.3	16.1	89.7					11	1			0.69	0.77	0.69	4.42
	12	1.45			4.39	9	7.2	95.9					12	1			0.93	1.07	1.1	13.18
	14	2.57	1.93	1.43	2.37	16.5	8.09	90.6					14	1	0.96	0.98	1.11	1.39	1.11	15.53
	15	1.52	8.7	1.81	3.07			98					15	1	1.11	1.02	1.11			16.37
	16	5.05	3.78	5.33	6.35			90.2					16	1	0.99	0.99	1.05			19.37
	33	15.5			11.7			93.2					33	1			0.96			5.64
	34	4.43			4.66			81.5					34	1			1.05			5.71
	Statistical analysis												Statistical analysis
	Did not pass Shapiro-Wilk normality test												Did not pass Shapiro-Wilk normality test
	Kruskal-Wallis test with Dunn's multiple comparisons test												Kruskal-Wallis test with Dunn's multiple comparisons test
	Kruskal-Wallis test												Kruskal-Wallis test
	Kruskal-Wallis statistics	43.02											Kruskal-Wallis statistics	36.43
	P value	<0.0001											P value	<0.0001
	Dunn's multiple comparisons test	Mean rank diff.	Significant?	Summary	Adjusted P Value								Dunn's multiple comparisons test	Mean rank diff.	Significant?	Summary	Adjusted P Value
	Jurkat vs. CEM	6.875	No	ns	>0.9999								Jurkat vs. CEM	1.5	No	ns	>0.9999
	Jurkat vs. Molt-4	12.54	No	ns	>0.9999								Jurkat vs. Molt-4	3	No	ns	>0.9999
	Jurkat vs. C91-PL	1.208	No	ns	>0.9999								Jurkat vs. C91-PL	-3.375	No	ns	>0.9999
	Jurkat vs. MT-2	-20.21	No	ns	0.0525								Jurkat vs. MT-2	-18.75	No	ns	0.0864
	Jurkat vs. Hut102	-11.65	No	ns	0.7848								Jurkat vs. Hut102	-9.625	No	ns	>0.9999
	Jurkat vs. LPS	-32.96	Yes	****	<0.0001								Jurkat vs. LPS	-34.42	Yes	****	<0.0001

## Sheet: Sup Figure 2c
Sup Figure 2c
CD80 as % of CD11c+ MDDC (24h)												Normalized CD80 MFI (24h)
	MDDC exposed to	Jurkat	CEM	Molt-4	C91-PL	MT-2	Hut102	LPS		n=7 (Jurkat;C91-PL;LPS)			MDDC exposed to	Jurkat	CEM	Molt-4	C91-PL	MT-2	Hut102	LPS		n=7 (Jurkat;C91-PL;LPS)
	12	29.8			26.8	37.5	39.6	95		n=3 (CEM;Molt-4)			12	1			0.95	1.12	1.13	2.26		n=3 (CEM;Molt-4)
	13	69.2			76.1	73.2	66.6	98		n=5 (MT-2;Hut102)			13	1			1.09	1.05	0.98	1.69		n=5 (MT-2;Hut102)
	14	80	74.2	74.4	86.7	84.8	66.3	99.1					14	1	0.95	0.97	1.12	1.07	0.89	1.72
	15	29.2	39.7	40.1	52.7	56.9	43.4	98					15	1	1.08	1.09	1.33	1.29	1.13	2.34
	16	51.6	61.3	40	64.8	68.1	52.2	97					16	1	1.09	0.91	1.27	1.24	1.02	2.01
	33	43.6			47.3			95.1					33	1			1.07			5.85
	34	18			16.2			91.2					34	1			0.94			6.88
	Statistical analysis												Statistical analysis
	Did not pass Shapiro-Wilk normality test												Did not pass Shapiro-Wilk normality test
	Kruskal-Wallis test with Dunn's multiple comparisons test												Kruskal-Wallis test with Dunn's multiple comparisons test
	Kruskal-Wallis test												Kruskal-Wallis test
	Kruskal-Wallis statistics	17.9											Kruskal-Wallis statistics	21.45
	P value	0.0065											P value	0.0015
	Dunn's multiple comparisons test	Mean rank diff.	Significant?	Summary	Adjusted P Value								Dunn's multiple comparisons test	Mean rank diff.	Significant?	Summary	Adjusted P Value
	Jurkat vs. CEM	-4.429	No	ns	>0.9999								Jurkat vs. CEM	-3.833	No	ns	>0.9999
	Jurkat vs. Molt-4	-2.429	No	ns	>0.9999								Jurkat vs. Molt-4	1.333	No	ns	>0.9999
	Jurkat vs. C91-PL	-3	No	ns	>0.9999								Jurkat vs. C91-PL	-7.214	No	ns	>0.9999
	Jurkat vs. MT-2	-7.029	No	ns	>0.9999								Jurkat vs. MT-2	-11.6	No	ns	0.3971
	Jurkat vs. Hut102	-2.229	No	ns	>0.9999								Jurkat vs. Hut102	-3.8	No	ns	>0.9999
	Jurkat vs. LPS	-21.43	Yes	**	0.0013								Jurkat vs. LPS	-23	Yes	***	0.0004
CD80 as % of CD11c+ MDDC												Normalized CD80 MFI (48h)
	MDDC exposed to	Jurkat	CEM	Molt-4	C91-PL	MT-2	Hut102	LPS		n=12 (Jurkat;C91-PL;LPS)			MDDC exposed to	Jurkat	CEM	Molt-4	C91-PL	MT-2	Hut102	LPS		n=12 (Jurkat;C91-PL;LPS)
	4	40.8			49.8	53.7	37.3	88.7		n=3 (CEM;Molt-4)			4	1			1.16	1.24	0.93	2.12		n=3 (CEM;Molt-4)
	5	49.6			46.6	49.9	51.5	99		n=8 (MT-2;Hut102)			5	1			0.95	1	1.03	3.32		n=8 (MT-2;Hut102)
	7	65.1			53.8	51.9	53.1	96.3					7	1			0.85	0.83	0.84	2.06
	8	53.8			58.1	49.2	58	93.4					8	1			1.07	0.92	1.07	1.96
	10	74.5			59	78.5	28.1	94.2					10	1			0.89	1.08	0.68	1.32
	11	36.9			32.8	23.8	30.2	94.8					11	1			0.91	0.77	0.89	2.37
	12	38.8			30.2	36	48.8	89.8					12	1			0.79	0.96	1.27	2.85
	14	41.7	19.8	15.8	30.5	41.4	13.8	95.7					14	1	0.82	0.77	0.86	1	0.72	1.88
	15	59	57.5	54.9	55.7			90.2					15	1	0.96	0.94	0.95			1.82
	16	60.4	60.3	51.1	53.1			83.8					16	1	0.99	0.8	0.83			1.58
	33	55			48.8			95.1					33	1			0.9			2.33
	34	31.9			36.2			91.2					34	1			1.15			4.21
	Statistical analysis												Statistical analysis
	Passed Shapiro-Wilk normality test												Passed Shapiro-Wilk normality test
	Ordinary one-way ANOVA with Dunnett's mutliple comparisons test												Ordinary one-way ANOVA with Dunnett's mutliple comparisons test
	ANOVA summary												ANOVA summary
	DFn, DFd	6, 51											DFn, DFd	6, 51
	F	20.78											F	19.71
	P value	<0.0001											P value	<0.0001
	Dunnett's multiple comparisons test	Mean Diff.	95.00% CI of diff.	Significant?	Summary	Adjusted P Value							Dunnett's multiple comparisons test	Mean Diff.	95.00% CI of diff.	Significant?	Summary	Adjusted P Value
	Jurkat vs. CEM	4.758	-17.90 to 27.41	No	ns	0.9892							Jurkat vs. CEM	0.07667	-0.5983 to 0.7516	No	ns	0.9996
	Jurkat vs. Molt-4	10.03	-12.63 to 32.68	No	ns	0.7398							Jurkat vs. Molt-4	0.1633	-0.5116 to 0.8383	No	ns	0.9774
	Jurkat vs. C91-PL	4.408	-9.921 to 18.74	No	ns	0.9324							Jurkat vs. MT-2	0.025	-0.4523 to 0.5023	No	ns	0.9998
	Jurkat vs. MT-2	2.575	-13.45 to 18.60	No	ns	0.997							Jurkat vs. Hut102	0.07125	-0.4060 to 0.5485	No	ns	0.9979
	Jurkat vs. Hut102	10.53	-5.495 to 26.55	No	ns	0.3477							Jurkat vs. LPS	-1.318	-1.745 to -0.8915	Yes	****	<0.0001
	Jurkat vs. LPS	-42.06	-56.39 to -27.73	Yes	****	<0.0001

## Sheet: Sup Figure 2d
Sup Figure 2d
CD40 as % of CD11c+ MDDC (48h)										Normalized CD40 MFI (48h)
	MDDC exposed to	Jurkat	C91-PL	MT-2	Hut102	LPS		n=4 (all)			MDDC exposed to	Jurkat	C91-PL	MT-2	Hut102	LPS		n=4 (all)
	5	13.5	9.68	37.8	24.5	88					5	1	0.93	1.49	1.28	3.07
	6	40.2	24	66	49.1	77.9					6	1	0.78	1.38	1.11	1.59
	7	46.9	38.4	56.2	56.3	78.2					7	1	0.92	1.11	1.1	1.39
	8	71.6	61.3	77.7	73.2	92.9					8	1	0.89	1.06	1.01	1.54
	Statistical analysis										Statistical analysis
	Passed Shapiro-Wilk normality test										Did not pass Shapiro-Wilk normality test
	RM one-way ANOVA with Dunnett's mutliple comparisons test										Kruskal-Wallis test with Dunn's multiple comparisons test
	ANOVA summary										Kruskal-Wallis test
	DFn, DFd	1.391, 4.174									Kruskal-Wallis statistics	17.41
	F	14.6									P value	0.0016
	P value	0.0151
											Dunn's multiple comparisons test	Mean rank diff.	Significant?	Summary	Adjusted P Value
	Dunnett's multiple comparisons test	Mean Diff.	95.00% CI of diff.	Significant?	Summary	Adjusted P Value					Jurkat vs. C91-PL	4	No	ns	>0.9999
	Jurkat vs. C91-PL	9.705	-1.912 to 21.32	No	ns	0.0794					Jurkat vs. MT-2	-7.125	No	ns	0.3489
	Jurkat vs. MT-2	-16.38	-39.34 to 6.591	No	ns	0.1168					Jurkat vs. Hut102	-5.125	No	ns	0.8745
	Jurkat vs. Hut102	-7.725	-17.21 to 1.761	No	ns	0.0846					Jurkat vs. LPS	-11.75	Yes	*	0.0192
	Jurkat vs. LPS	-41.2	-93.85 to 11.45	No	ns	0.0934

## Sheet: Sup Figure 2e
Sup Figure 2e
ICOSL as % of CD11c+ MDDC (24h)												Normalized ICOSL MFI (24h)
	MDDC exposed to	Jurkat	CEM	Molt-4	C91-PL	MT-2	Hut102	LPS		n=4 (Jurkat;C91-PL;MT-2;Hut102;LPS)			MDDC exposed to	Jurkat	CEM	Molt-4	C91-PL	MT-2	Hut102	LPS		n=4 (Jurkat;C91-PL;MT-2;Hut102;LPS)
	13	73.6			72.5	68.1	72	39.6		n=3 (CEM;Molt-4)			13	1			0.87	0.79	0.92	0.31		n=3 (CEM;Molt-4)
	14	77.1	76.1	69.1	72.8	69	72.6	38.9					14	1	0.98	0.76	0.84	0.7	0.82	0.29
	15	51.1	45.9	48.4	43.8	44.3	42.4	13.5					15	1	0.86	0.92	0.86	0.86	0.83	0.71
	16	61.7	66.4	65.9	66.7	64.1	59.4	27.4					16	1	1.14	1.14	1.15	1.06	0.95	0.63
	Statistical analysis												Statistical analysis
	Passed Shapiro-Wilk normality test												Did not pass Shapiro-Wilk normality test
	Ordinary one-way ANOVA with Dunnett's mutliple comparisons test												Kruskal-Wallis test with Dunn's multiple comparisons test
	ANOVA summary												Kruskal-Wallis test
	DFn, DFd	6, 19											Kruskal-Wallis statistics	13.25
	F	3.756											P value	0.0393
	P value	0.0124
													Dunn's multiple comparisons test	Mean rank diff.	Significant?	Summary	Adjusted P Value
	Dunnett's multiple comparisons test	Mean Diff.	95.00% CI of diff.	Significant?	Summary	Adjusted P Value							Jurkat vs. CEM	2.333	No	ns	>0.9999
	Jurkat vs. CEM	3.075	-24.77 to 30.92	No	ns	0.9995							Jurkat vs. Molt-4	5.167	No	ns	>0.9999
	Jurkat vs. Molt-4	4.742	-23.10 to 32.59	No	ns	0.9929							Jurkat vs. C91-PL	5	No	ns	>0.9999
	Jurkat vs. C91-PL	1.925	-23.85 to 27.70	No	ns	0.9997							Jurkat vs. MT-2	9	No	ns	0.5711
	Jurkat vs. MT-2	4.5	-21.28 to 30.28	No	ns	0.992							Jurkat vs. Hut102	8.125	No	ns	0.7917
	Jurkat vs. Hut102	4.275	-21.50 to 30.05	No	ns	0.9936							Jurkat vs. LPS	17.75	Yes	**	0.006
	Jurkat vs. LPS	36.03	10.25 to 61.80	Yes	**	0.0044
												Normalized ICOSL MFI (48h)
ICOSL as % of CD11c+ MDDC (48h)													MDDC exposed to	Jurkat	CEM	Molt-4	C91-PL	MT-2	Hut102	LPS		n=8 (Jurkat;C91-PL;LPS)
	MDDC exposed to	Jurkat	CEM	Molt-4	C91-PL	MT-2	Hut102	LPS		n=8 (Jurkat;C91-PL;LPS)			5	1			0.71	0.49	0.7	0.27		n=3 (CEM;Molt-4)
	5	68.8			56.4	46.7	58.2	26.9		n=3 (CEM;Molt-4)			6	1			0.35	0.33	0.44	0.25		n=6 (MT-2;Hut102)
	6	80.3			52.2	50.4	59.2	38.7		n=6 (MT-2;Hut102)			7	1			0.47	0.35	0.61	0.3
	7	77			60.4	52.1	65.2	48.1					8	1			1.14	1.03	0.67	0.5
	8	88.7			86.5	85	59.8	28.4					10	1			0.35	0.61	0.62	0.32
	10	52.1			29.2	37.9	38.8	13.7					12	1	1.01	0.9	0.33	0.35	0.55	0.32
	12	88.4	87.3	86.8	61.3	66.4	78.2	62					14	1	0.65	0.96	0.53			0.69
	14	43.6	28	42.7	23.2			18.7					15	1	1.07	0.49	0.5			0.62
	15	64.9	67.3	45.4	45.6			44.8
													Statistical analysis
	Statistical analysis												Did not pass Shapiro-Wilk normality test
	Passed Shapiro-Wilk normality test												Kruskal-Wallis test with Dunn's multiple comparisons test
	Ordinary one-way ANOVA with Dunnett's mutliple comparisons test												Kruskal-Wallis test
	ANOVA summary												Kruskal-Wallis statistics	21.43
	DFn, DFd	6, 35											P value	0.0015
	F	2.699
	P value	0.0293											Dunn's multiple comparisons test	Mean rank diff.	Significant?	Summary	Adjusted P Value
													Jurkat vs. CEM	-0.1667	No	ns	>0.9999
	Dunnett's multiple comparisons test	Mean Diff.	95.00% CI of diff.	Significant?	Summary	Adjusted P Value							Jurkat vs. Molt-4	10	No	ns	>0.9999
	Jurkat vs. CEM	9.608	-24.23 to 43.44	No	ns	0.945							Jurkat vs. C91-PL	16.63	Yes	*	0.039
	Jurkat vs. Molt-4	12.18	-21.66 to 46.01	No	ns	0.8578							Jurkat vs. MT-2	17.75	Yes	*	0.0429
	Jurkat vs. C91-PL	18.63	-6.364 to 43.61	No	ns	0.2178							Jurkat vs. Hut102	13.5	No	ns	0.2446
	Jurkat vs. MT-2	14.06	-12.93 to 41.05	No	ns	0.5691							Jurkat vs. LPS	24.5	Yes	***	0.0004
	Jurkat vs. Hut102	10.58	-16.42 to 37.57	No	ns	0.8083
	Jurkat vs. LPS	35.31	10.32 to 60.30	Yes	**	0.0026

## Sheet: Sup Figure 2f
Sup Figure 2f
PD-L1 as % of CD11c+ MDDC (24h)												Normalized PDL1 MFI (24h)
	MDDC exposed to	Jurkat	CEM	Molt-4	C91-PL	MT-2	Hut102	LPS		n=4 (Jurkat;C91-PL;MT-2;Hut102;LPS)			MDDC exposed to	Jurkat	CEM	Molt-4	C91-PL	MT-2	Hut102	LPS		n=4 (Jurkat;C91-PL;MT-2;Hut102;LPS)
	13	12.3			13.8	23.3	14.4	58.2		n=3 (CEM;Molt-4)			13	1			1.02	1.39	1.06	3.56		n=3 (CEM;Molt-4)
	14	13.6	13	14	18.7	23.9	16.7	89.1					14	1	0.95	0.97	1.04	1.13	1.02	2.84
	15	7.3	8.25	6.75	10.2	11	9.91	63.5					15	1	1.02	0.99	1.06	1.07	1.02	2.98
	16	15.7	15.3	13.3	17.3	23.3	17	73.5					16	1	1.15	1.18	1.27	1.36	1.21	3.98
	Statistical analysis												Statistical analysis
	Did not pass Shapiro-Wilk normality test												Did not pass Shapiro-Wilk normality test
	Kruskal-Wallis test with Dunn's multiple comparisons test												Kruskal-Wallis test with Dunn's multiple comparisons test
	Kruskal-Wallis test												Kruskal-Wallis test
	Kruskal-Wallis statistics	14.34											Kruskal-Wallis statistics	17.22
	P value	0.026											P value	0.0085
	Dunn's multiple comparisons test	Mean rank diff.	Significant?	Summary	Adjusted P Value								Dunn's multiple comparisons test	Mean rank diff.	Significant?	Summary	Adjusted P Value
	Jurkat vs. CEM	0.1667	No	ns	>0.9999								Jurkat vs. CEM	-3.667	No	ns	>0.9999
	Jurkat vs. Molt-4	1.167	No	ns	>0.9999								Jurkat vs. Molt-4	-2.167	No	ns	>0.9999
	Jurkat vs. C91-PL	-4.75	No	ns	>0.9999								Jurkat vs. C91-PL	-8.25	No	ns	0.7547
	Jurkat vs. MT-2	-8.75	No	ns	0.6338								Jurkat vs. MT-2	-13	No	ns	0.0951
	Jurkat vs. Hut102	-4	No	ns	>0.9999								Jurkat vs. Hut102	-7.375	No	ns	>0.9999
	Jurkat vs. LPS	-16	Yes	*	0.0185								Jurkat vs. LPS	-19	Yes	**	0.0025
PD-L1 as % of CD11c+ MDDC (48h)												Normalized PDL1 MFI (48h)
	MDDC exposed to	Jurkat	CEM	Molt-4	C91-PL	MT-2	Hut102	LPS		n=7 (Jurkat;C91-PL;LPS)			MDDC exposed to	Jurkat	CEM	Molt-4	C91-PL	MT-2	Hut102	LPS		n=7 (Jurkat;C91-PL;LPS)
	5	5.37			10.8	37.7	20.3	67.5		n=3 (CEM;Molt-4)			5	1			1.15	2.3	1.57	3.79		n=3 (CEM;Molt-4)
	7	21.8			32.1	42.5	41.6	75		n=5 (MT-2;Hut102)			7	1			1.34	1.46	1.49	2.57		n=5 (MT-2;Hut102)
	8	29.3			24	33.8	32.1	70.6					8	1			0.75	0.9	0.89	1.77
	11	31.8			23.7	43.3	29.4	84.5					11	1			0.77	1.48	0.93	3.67
	14	6.12	6	5.1	9.18	28.3	13.7	77					14	1	0.93	0.98	0.88	1.4	1.12	2.71
	15	6.14	13.6	7.8	7.93			45.5					15	1	1.12	1.09	0.96			2
	16	9.66	10.8	12.5	13.6			58.9					16	1	1.14	1.08	1.08			2.6
	Statistical analysis												Statistical analysis
	Passed Shapiro-Wilk normality test												Passed Shapiro-Wilk normality test
	Ordinary one-way ANOVA with Dunnett's mutliple comparisons test												Ordinary one-way ANOVA with Dunnett's mutliple comparisons test
	ANOVA summary												ANOVA summary
	DFn, DFd	6, 30											DFn, DFd	6, 30
	F	23.26											F	14.95
	P value	<0.0001											P value	<0.0001
	Dunnett's multiple comparisons test	Mean Diff.	95.00% CI of diff.	Significant?	Summary	Adjusted P Value							Dunnett's multiple comparisons test	Mean Diff.	95.00% CI of diff.	Significant?	Summary	Adjusted P Value
	Jurkat vs. CEM	5.608	-13.37 to 24.59	No	ns	0.9312							Jurkat vs. CEM	-0.06333	-0.8552 to 0.7286	No	ns	0.9997
	Jurkat vs. Molt-4	7.275	-11.70 to 26.25	No	ns	0.8154							Jurkat vs. Molt-4	-0.05	-0.8419 to 0.7419	No	ns	0.9997
	Jurkat vs. C91-PL	-1.589	-16.29 to 13.11	No	ns	0.9996							Jurkat vs. C91-PL	0.01	-0.6034 to 0.6234	No	ns	>0.9999
	Jurkat vs. MT-2	-21.38	-37.48 to -5.276	Yes	**	0.0054							Jurkat vs. MT-2	-0.508	-1.180 to 0.1640	No	ns	0.2028
	Jurkat vs. Hut102	-11.68	-27.78 to 4.424	No	ns	0.2367							Jurkat vs. Hut102	-0.2	-0.8720 to 0.4720	No	ns	0.9292
	Jurkat vs. LPS	-52.69	-67.39 to -37.99	Yes	****	<0.0001							Jurkat vs. LPS	-1.73	-2.343 to -1.117	Yes	****	<0.0001

## Sheet: Sup Figure 2g
Sup Figure 2g
TNF-a (pg/mL) (left)										IFN-I (U/mL) (right)
	MDDC exposed to	Jurkat	C91-PL	MT-2	Hut102	LPS		n=3			MDDC exposed to	Jurkat	C91-PL	MT-2	Hut102	LPS		n=8 (Jurkat;C91-PL;LPS)
		368.28	2704.32	671.4	2180.8	33335.3						10	10	10.75	10	3096.05		n=5 (MT-2;Hut102)
		487.74	1323.38	463.64	3067.48	30474.2						11.76	28.27	14.19	11.34	2792.72
		100	783.7	344.74	708.68	24420.8						10	16.51	10.48	10	5825.1
												19.9	46.16			173.08
	Statistical analysis											12.75	16.21	28.41	215.58	1022.21
	Passed Shapiro-Wilk normality test											27.64	43.25	19.39	20.91	2338.61
	RM one-way ANOVA with Dunnett's mutliple comparisons test											27.39	26.24			418.19
	ANOVA summary											26.1	27.4			1368.93
	DFn, DFd	1.112, 2.225
	F	135.3									Statistical analysis
	P value	0.0049									Did not pass Shapiro-Wilk normality test
											Kruskal-Wallis test with Dunn's multiple comparisons test
	Dunnett's multiple comparisons test	Mean Diff.	95.00% CI of diff.	Significant?	Summary	Adjusted P Value					Kruskal-Wallis test
	Jurkat vs. C91-PL	-1285	-4720 to 2149	No	ns	0.2817					Kruskal-Wallis statistics	19.07
	Jurkat vs. MT-2	-174.6	-830.9 to 481.7	No	ns	0.4484					P value	0.0008
	Jurkat vs. Hut102	-1667	-5403 to 2069	No	ns	0.2138
	Jurkat vs. LPS	-29091	-45608 to -12575	Yes	*	0.0166					Dunn's multiple comparisons test	Mean rank diff.	Significant?	Summary	Adjusted P Value
											Jurkat vs. C91-PL	-5	No	ns	>0.9999
											Jurkat vs. MT-2	-0.075	No	ns	>0.9999
											Jurkat vs. Hut102	0.725	No	ns	>0.9999
											Jurkat vs. LPS	-18.25	Yes	***	0.001

## Sheet: Sup Figure 2h
Sup Figure 2h
Gag p19 as % of CD11c+ MDDC
	MDDC exposed to	Jurkat	C91-PL	MT-2	Hut102		n=14 (Jurkat;C91-PL)
	11	1.8	64	79.4	18.4		n=7 (MT-2;Hut102)
	12	0.55	35.1	50.9	5.74
	13	2.15	79.2	76.5	18.2
	14	0.59	64.8	44.9	5.8
	15	0.076	71.3	52.8	7.16
	16	0.082	69.9	71.4	6.5
	17	0.26	10.3
	18	0.07	11.5
	19	0.066	28.5
	20	0.75	35.7
	21	0.42	38.4
	22	0.48	32.6
	23	0.09	14.7
	24	1.07	58.3	22.1	4.91
	Statistical analysis
	Did not pass Shapiro-Wilk normality test
	Kruskal-Wallis test with Dunn's multiple comparisons test
	Kruskal-Wallis test
	Kruskal-Wallis statistics	33.68
	P value	<0.0001
	Dunn's multiple comparisons test	Mean rank diff.	Significant?	Summary	Adjusted P Value
	Jurkat vs. C91-PL	-22.79	Yes	****	<0.0001
	Jurkat vs. MT-2	-27.07	Yes	****	<0.0001
	Jurkat vs. Hut102	-11.36	No	ns	0.1365

## Sheet: Sup Figure 2i
Sup Figure 2i
Correlation
	Measured Parameter	CD86 as % of CD11c+ MDDC	Gag p19 as % of CD11c+ MDDC		n=15
	12	27.9	28.9
	13	21.6	79.2
	14	30.9	64.8
	15	30.1	71.3
	16	38.4	69.9
	17	34.2	10.3
	18	18.9	11.5
	19	23.5	28.5
	20	24.1	35.7
	21	27.6	38.4
	22	29	32.6
	23	26.8	14.7
	24	25.5	33.6
	25	21.2	4
	26	34.7	58.3
	Statistical analysis
	Simple linear regression
	Best-fit values
	Slope	0.08905
	Y-intercept	24.17
	X-intercept	-271.5
	1/slope	11.23
	Goodness of Fit
	R squared	0.1588
	Sy.x	5.192
	Is slope significantly non-zero?
	F	2.454
	DFn. DFd	1. 13
	P value	0.1412
	Deviation from zero?	Not Significant

## Sheet: Sup Figure 4b
Sup Figure 4b
CCL19								BCL2L1
	RNAseq condition	MDDC/Jurkat	MDDC/Jurkat + LPS	MDDC/C91-PL		n=3			RNAseq condition	MDDC/Jurkat	MDDC/Jurkat + LPS	MDDC/C91-PL		n=3
	18	34.1731	9581.46	84.4002					18	2824.84	7595.59	3680.33
	20	23.8223	6763.81	151.835					20	3417.95	11587.5	4472.57
	23	52.7188	5902.58	145.624					23	3213.09	10086.4	5347.05
TNFSF13B								BCL2A1
	RNAseq condition	MDDC/Jurkat	MDDC/Jurkat + LPS	MDDC/C91-PL		n=3			RNAseq condition	MDDC/Jurkat	MDDC/Jurkat + LPS	MDDC/C91-PL		n=3
	18	3445.07	10023	7336.1					18	66.3572	4207.26	110.243
	20	3838	11257.5	8120.82					20	34.0707	3887.6	92.6216
	23	2828.3	10141.1	7555.63					23	50.3041	3167.94	196.915
TRIM25
	RNAseq condition	MDDC/Jurkat	MDDC/Jurkat + LPS	MDDC/C91-PL		n=3
	18	3150.43	16216.5	7757.06
	20	2916.7	20661.3	10129.4
	23	3033.93	18604	11127.3

[truncated: 12 more sheets: Sup Figure 4c, Sup Figure 5a, Sup Figure 5b, Sup Figure 5c, Sup Figure 5d, Sup Figure 5e, Sup Figure 6, Sup Figure 7b, Sup Figure 8a, Sup Figure 8b, Sup Figure 9a, Sup Figure 9b]
